# Supplementary material for: Phenome-wide association studies across large population cohorts support drug target validation
Source: PubMed Central journal article supplement (PMC6191429; doi:10.1038/s41467-018-06540-3), 2018-10-16
Supplement: 41467_2018_6540_MOESM1_ESM.pdf [file 41467_2018_6540_MOESM1_ESM.pdf]

# **Phenome-wide association studies across large population cohorts support drug target validation**

Diogo et al.

## SUPPLEMENTARY INFORMATION

|                                                                                                                                                                                                                                  |           |
|----------------------------------------------------------------------------------------------------------------------------------------------------------------------------------------------------------------------------------|-----------|
| <b>Supplementary Methods</b> .....                                                                                                                                                                                               | <b>3</b>  |
| <b>Gene selection</b> .....                                                                                                                                                                                                      | <b>3</b>  |
| <b>Supplementary Notes</b> .....                                                                                                                                                                                                 | <b>9</b>  |
| <b>Supplementary Note 1.</b> List of published studies in the Genomics plc GWAS database used in this study .....                                                                                                                | 9         |
| <b>Supplementary Figures</b> .....                                                                                                                                                                                               | <b>11</b> |
| <b>Supplementary Fig. 1.</b> Replication of known GWAS associations through meta-analysis of PheWAS results from four disease-agnostic cohorts with extensive health information .....                                           | 11        |
| <b>Supplementary Fig. 2.</b> Effect sizes of known GWAS associations in the meta-PheWAS .....                                                                                                                                    | 12        |
| <b>Supplementary Fig. 3.</b> Effect sizes of known GWAS associations in the disease-agnostic cohorts PheWAS .....                                                                                                                | 13        |
| <b>Supplementary Fig. 4.</b> Effects of replicated and putative novel associations (FDR<0.1). .....                                                                                                                              | 14        |
| <b>Supplementary Fig. 5.</b> Effect sizes of putative novel associations observed in the individual cohorts and in the meta-analysis. ....                                                                                       | 17        |
| <b>Supplementary Fig. 6.</b> Independent associations for galectin-3 plasma levels and Parkinson’s disease risk at the <i>GCHI-LGALS3</i> locus.....                                                                             | 18        |
| <b>Supplementary Fig. 7.</b> Phenotype-phenotype correlations in 23andMe.....                                                                                                                                                    | 19        |
| <b>Supplementary Fig. 8.</b> Association of <i>PNPLA3</i> rs738409-G with multiple disease-relevant endpoints. ....                                                                                                              | 20        |
| <b>Supplementary Tables</b> .....                                                                                                                                                                                                | <b>21</b> |
| <b>Supplementary Table 1.</b> SNP-phenotype associations reported earlier in published GWAS for the 25 SNPs interrogated through PheWAS in this study .....                                                                      | 21        |
| <b>Supplementary Table 2.</b> Examples of mapped phenotypic endpoints .....                                                                                                                                                      | 23        |
| <b>Supplementary Table 3.</b> Mapped phenotypes found in at least two disease-agnostic cohorts and included in the meta-analysis .....                                                                                           | 24        |
| <b>Supplementary Table 4.</b> Replication of known GWAS associations in the PheWAS meta-analysis .....                                                                                                                           | 29        |
| <b>Supplementary Table 5.</b> Putative novel associations identified in the meta-PheWAS .....                                                                                                                                    | 32        |
| <b>Supplementary Table 6.</b> Replication of potential novel associations in the latest release of UK Biobank .....                                                                                                              | 35        |
| <b>Supplementary Table 7.</b> Novel association of the <i>PNPLA3</i> SNP rs738409 in the 23andMe cohort, before and after adjusting for elevated liver test.....                                                                 | 37        |
| <b>Supplementary Table 8.</b> Association of the <i>IFIH1</i> SNP rs2111485 (in complete LD with the <i>IFIH1</i> missense SNP rs1990760) with asthma in 23andMe cohort, before and after adjusting for autoimmune diseases..... | 38        |
| <b>Supplementary References</b> .....                                                                                                                                                                                            | <b>39</b> |

## Supplementary Methods

### Gene selection

A short description of the selected candidate target genes and level of genetic and/or biological support for a link to common human disease is provided. All SNPs selected for PheWAS in this study (bold) had reported genome-wide significant GWAS associations ( $P < 5e-8$ ) in the European population.

---

| <b>A. Autoimmunity</b> |                                                                                                                                                                                                                                                                                                                                                                                                                                                                                                                                                                                                                                                                                                                                                                                                                                                                                                                                                                                   |
|------------------------|-----------------------------------------------------------------------------------------------------------------------------------------------------------------------------------------------------------------------------------------------------------------------------------------------------------------------------------------------------------------------------------------------------------------------------------------------------------------------------------------------------------------------------------------------------------------------------------------------------------------------------------------------------------------------------------------------------------------------------------------------------------------------------------------------------------------------------------------------------------------------------------------------------------------------------------------------------------------------------------|
| <i>ATG16L1</i>         | <i>ATG16L1</i> encodes the Autophagy-related protein 16 like 1. SNPs at the <i>ATG16L1</i> locus are unequivocally associated with Crohn's disease (CD) and inflammatory bowel disease (IBD) <sup>1-3</sup> . The missense SNP rs2241880 (p.T300A) has been proposed as a causal risk SNP. pT300A renders the ATG16L1 protein susceptible to degradation by caspase-3, which leads to reduced autophagy, elevated inflammatory cytokine response, and reduced pathogen clearance <sup>4,5</sup> . The intronic variant <b>rs13391356</b> analyzed here is in tight linkage disequilibrium (LD) ( $r^2=0.99$ ) with rs2241880. It is hypothesized that stabilizing ATG16L1 protein and/or enhancing its function may be of therapeutic benefit to CD and IBD patients.                                                                                                                                                                                                             |
| <i>CARD9</i>           | <i>CARD9</i> encodes the recruitment domain-containing protein 9. Independent SNPs at the <i>CARD9</i> locus, including the missense SNP <b>rs4077515</b> (p.S12N) and the intronic SNP <b>rs11145766</b> , are consistently associated with an increased risk of IBD, CD and ulcerative colitis (UC) in GWAS <sup>6,7</sup> . The IBD risk allele rs4077515-T increases <i>CARD9</i> mRNA levels in blood <sup>8</sup> . Conversely, the splice-site variant IVS11+1G>C creates a premature termination codon that causes loss-of-function and is associated with protection from IBD <sup>9</sup> . Complete loss of <i>CARD9</i> leads to susceptibility to fungal infections <sup>10</sup> , consistent with its biological function as a molecular scaffold for the assembly of a BCL10 signaling complex that activates NF-kappaB <sup>11</sup> . It is hypothesized that moderate reduction of <i>CARD9</i> function may be of therapeutic benefit to CD and IBD patients. |
| <i>CD226</i>           | <i>CD226</i> , also called DNAX accessory molecule (DNAM-1), is an activating immunoreceptor expressed at the surface of natural killer (NK) cells, T cells, monocytes and platelets. The gene has been described to play an important role in NK cells function <sup>12,13</sup> . SNPs at the <i>CD226</i> locus, including the missense SNP <b>rs763361</b> (p.S307G), are associated with IBD, T1D and mean platelet volume (MPV) in the European population, with the allele increasing IBD and T1D risk being associated with decreased MPV <sup>3,14,15</sup> . Studies suggested a decreased expression of <i>CD226</i> in patients with autoimmune diseases, consistent with the rs763361 autoimmunity risk allele being associated with reduced expression of <i>CD226</i> <sup>16,17</sup> .                                                                                                                                                                           |
| <i>GPR35</i>           | The G protein-coupled receptor 35 (GPR35) is a recently deorphanized GPCR detected in numerous tissues, including the gastrointestinal tract, the immune system, and the cardiovascular system <sup>18</sup> . SNPs at the <i>GPR35</i> locus, including the <i>GPR35</i> missense SNP <b>rs3749171</b> (p.T139M), have been found associated with UC and IBD <sup>3</sup> .                                                                                                                                                                                                                                                                                                                                                                                                                                                                                                                                                                                                      |

---

|              |                                                                                                                                                                                                                                                                                                                                                                                                                                                                                                                                                                                                                                                                                                                                                                                                                                                                                                                                                                                                                                                                                                                                                                                                                                                                                                                                                                                                                                                                                                                                                                                                                                                                                                                                                                                                                                                                                                                                                                  |
|--------------|------------------------------------------------------------------------------------------------------------------------------------------------------------------------------------------------------------------------------------------------------------------------------------------------------------------------------------------------------------------------------------------------------------------------------------------------------------------------------------------------------------------------------------------------------------------------------------------------------------------------------------------------------------------------------------------------------------------------------------------------------------------------------------------------------------------------------------------------------------------------------------------------------------------------------------------------------------------------------------------------------------------------------------------------------------------------------------------------------------------------------------------------------------------------------------------------------------------------------------------------------------------------------------------------------------------------------------------------------------------------------------------------------------------------------------------------------------------------------------------------------------------------------------------------------------------------------------------------------------------------------------------------------------------------------------------------------------------------------------------------------------------------------------------------------------------------------------------------------------------------------------------------------------------------------------------------------------------|
| <i>GPR65</i> | <i>GPR65</i> encodes the G protein coupled receptor 65, also known as T-cell death associated gene 8 (TDAG8). GWAS have identified SNPs at the <i>GPR65</i> locus as associated with CD and UC <sup>3</sup> . The lead SNP, rs8005161, is in perfect LD with the <i>GPR65</i> missense SNP <b>rs3742704</b> (p.I231L). In functional studies, I231L was shown to alter GPR65 signaling and to affect lysosomal pH, leading to lysosomal dysfunction and impaired bacterial restriction <sup>19</sup> .                                                                                                                                                                                                                                                                                                                                                                                                                                                                                                                                                                                                                                                                                                                                                                                                                                                                                                                                                                                                                                                                                                                                                                                                                                                                                                                                                                                                                                                           |
| <i>IFIH1</i> | <i>IFIH1</i> encodes the Interferon-induced helicase C domain-containing protein 1, also known as Melanoma differentiation-associated protein 5 (MDA5), a cytoplasmic sensor of viral nucleic acids that plays a major role in the activation of a cascade of antiviral responses including the induction of type I interferons and pro-inflammatory cytokines <sup>20</sup> . Rare gain-of-function (GOF) mutations in <i>IFIH1</i> have been reported to cause Aicardi-Goutières syndrome and Singleton-Merten syndrome 1, two syndromes characterized by high interferon signaling <sup>21-23</sup> . Conversely, rare loss-of-function (LOF) variants that lead to severe disruption of <i>IFIH1</i> signaling function have been recently shown to cause a primary immunodeficiency manifested in extreme susceptibility to common respiratory RNA viruses <sup>24,25</sup> . In addition, an allelic series of rare, low-frequency and common LOF alleles (rs35744605, <b>rs35667974</b> , <b>rs1990760</b> ) has been shown to protect against multiple autoimmune diseases, including type 1 diabetes (T1D), vitiligo, lupus and psoriasis, while rs1990760 and rs35667974 were found associated with increased risk of ulcerative colitis <sup>26-36</sup> . The rare T1D protective rs35744605 (p.E627X) and rs35667974 (p.I923V) alleles confer a significant inhibition of IFN $\beta$ production, and the common T1D protective allele rs1990760 (p.T946A) has been shown to reduce MDA5 expression following IFN $\beta$ treatment <sup>27,32</sup> . Furthermore, mice heterozygote or homozygote for the rs1990760 T1D risk allele exhibit higher interferon signature, enhanced resistance to viral challenge, and higher incidence of streptozocin-induced T1D <sup>37</sup> . Based on the genetic findings, it is hypothesized that MDA5 inhibition might be of therapeutic benefit for patients diagnosed with several autoimmune diseases. |
| <i>IRF5</i>  | The interferon regulatory factor 5 (IRF5) is involved in the activation of type I interferon signaling in response to viral infection. Common GWAS SNPs are associated with multiple autoimmune diseases. Two independent signals at the locus, driven by <b>rs10488631</b> and <b>rs2004640</b> , are associated with rheumatoid arthritis (RA), primary biliary cirrhosis (PBC), systemic lupus erythematosus (SLE), and Sjogren's syndrome <sup>35,38-40</sup> . In addition, a SNP in LD with rs10488631 (rs62478615) was reported associated with systemic sclerosis <sup>41</sup> , and <b>rs3823536</b> (in LD with rs2004640) has been reported associated with ulcerative colitis <sup>3</sup> . Multiple studies evaluating the function of rs2004640 have shown the autoimmune risk allele to increase IRF5 mRNA and protein levels in immune cells, upregulate IFN $\alpha$ -induced genes, and increase pro-inflammatory cytokine production by monocyte-derived dendritic cells and monocyte-derived macrophages <sup>42-44</sup> . Based on the genetic findings, it is hypothesized that IRF5 inhibition might be of therapeutic benefit for patients diagnosed with autoimmune diseases.                                                                                                                                                                                                                                                                                                                                                                                                                                                                                                                                                                                                                                                                                                                                                        |

---

**TYK2** The Tyrosine kinase 2 (TYK2) is a member of the Janus kinase (JAK) family of proteins that mediates signaling downstream of several cytokine receptors. TYK2-signaling deficient patients carrying rare *TYK2* LOF mutations and characterized by immunodeficiency have been reported<sup>45, 46</sup>. In GWAS, independent low-frequency (**rs34536443**) and common (**rs12720356**) *TYK2* missense SNPs have been associated with a variety of autoimmune diseases, including RA, SLE, IBD, Psoriasis, and multiple sclerosis (MS)<sup>3, 35, 38, 47-49</sup>. The protective alleles have been reported to decrease TYK2 kinase activity and downstream signaling in immune cells<sup>50, 51</sup>. It is hypothesized that TYK2 inhibition might be of therapeutic benefit for patients diagnosed with autoimmune diseases.

---

### ***B. Immunity***

---

**CDHR3** The cadherin-related family, member 3 (CHDR3) transmembrane protein is involved in cell adhesion, epithelial polarity, cell-cell interaction and differentiation, and is predominantly expressed in respiratory epithelium. A GWAS in Danish asthma patients identified the coding SNP **rs6967330** (p.C529Y) in *CDHR3* as associated with recurrent childhood asthma exacerbation<sup>52</sup>. The disease-associated SNP locates to the protein's extracellular domain and is associated with increased CDHR3 cell surface expression. This SNP was shown to stimulate cell internalization of rhinovirus C, a known stimulus for asthma exacerbation, in cultured cells<sup>53</sup>. It is hypothesized that inhibition of CDHR3 might reduce rhinovirus C internalization and virus-induced asthma-related symptoms.

---

### ***C. Cardiovascular & metabolic diseases***

---

**F11** Factor XI is a serine protease within the contact pathway of the coagulation cascade. In humans, Factor XI is encoded by *F11*. Deficiency of factor XI causes the rare condition hemophilia C which affects up to 8% of the Ashkenazi Jewish population<sup>54</sup>. Homozygotes and compound-heterozygotes for *F11* LOF mutations show little spontaneous bleeding, but surgical procedures may cause excessive blood loss, requiring prophylaxis. High levels of factor XI have been proposed to increase the risk of thrombosis. Common SNPs near *F11*, including rs4253417, rs1593, and **rs4253399**, have been associated with altered Factor XI plasma levels, activated partial thromboplastin time (aPTT) and venous thromboembolism risk<sup>55-57</sup>. FXI-reducing drugs are under development for the prevention of venous thrombosis<sup>58</sup>.

---

**F12** Coagulation factor XII, (Hageman factor) is a plasma serine protease and a zymogen form of factor XIIa, which is encoded by the *F12* gene. Factor XII is part of the coagulation cascade and activates factor XI and prekallikrein *in vitro*. Factor XII itself is activated by negatively charged surfaces and is the starting point of the intrinsic pathway. Factor XII deficiency is rare and inherited in an autosomal recessive manner<sup>59, 60</sup>. Typically, Factor XII deficiency is asymptomatic and, unlike FXI deficiency, does not result in excess bleeding. A suggested GOF mutation in *F12* has been reported in patients with hereditary angioedema<sup>61</sup>. Knockout mice are less susceptible to thrombosis<sup>62</sup>. Factor XII appears to be involved also in the later stages of clot formation. Common variants in *F12*

---

---

(rs2545801, **rs2731672**) have been associated with Factor XII levels, aPTT and plasma levels of various vasoactive substances including endothelin, bradykinin, adrenomedullin, chromogranin, and phenylalanine<sup>63, 64</sup>. Inhibition of Factor XII has been considered a therapeutic strategy for the prevention of thromboembolism.

---

*GDF15* Growth differentiation factor-(GDF-)15 is a stress-responsive cytokine emerging as a biomarker of cardiac and vascular dysfunction and disease. Elevated circulating levels of GDF-15 identify high-risk individuals across the cardiovascular continuum, from stable coronary artery disease to acute coronary syndrome and heart failure. The association of GDF-15 with outcome in these conditions is independent of clinical risk factors and established biomarkers, including NT-proBNP (N-terminal pro-B-type natriuretic peptide) and troponin. Common SNPs associated with BMI by the GIANT consortium have been identified in the proximal region of the *GDF15* gene<sup>65</sup>. The lead SNP **rs17724992** is an intronic SNP in *PGPEP1* where the minor allele associated with decreased BMI. *GDF15* was annotated as a gene with biological relevance to this locus in the original publication, but eQTL data does not support a direct functional effect on *GDF15* mRNA levels<sup>66</sup>. Increased serum levels of GDF-15 have been reported associated with type 2 diabetes (T2D) and impaired fasting glucose<sup>67</sup>.

---

*GUCY1A3* Soluble guanylate cyclase (sGC) is an intracellular enzyme that mediates the nitric oxide (NO) signaling pathway. It catalyzes synthesis of the second messenger cyclic guanosine monophosphate (cGMP), which leads to vasorelaxation and inhibits smooth muscle proliferation, leukocyte recruitment and platelet aggregation through a number of downstream mechanisms. In humans, sGC subunits are encoded by the genes *GUCY1A2*, *GUCY1A3*, *GUCY1B2* and *GUCY1B3*. An sGC activator, Ricoguat, is a marketed therapeutic in cardiopulmonary disease. Common SNPs near *GUCY1A3* (**rs13139571**) have been significantly associated with diastolic blood pressure, and suggestively associated with systolic blood pressure and hypertension<sup>68</sup>. The same SNPs are also associated with coronary artery disease and myocardial infarction<sup>68</sup>. rs13139571 is an intronic SNP in *GUCY1A3* and an eQTL for *GUCY1A3* in multiple tissues. Knockout of *GUCY1A3* or *GUCY1B3* in murine models results in hypertension<sup>69</sup>. Truncating mutations have been observed in patients with moyamoya disease with achalasia<sup>70</sup>.

---

*KNG1* Kininogen-1, encoded by the *KNG1* gene, is the precursor protein to high-molecular-weight kininogen (HMWK), low-molecular-weight kininogen (LMWK), and bradykinin. Alternative splicing of the *KNG1* gene leads to either low-molecular-weight kininogen (LMWK) or high-molecular-weight kininogen (HMWK) which can be cleaved to produce bradykinin. HMWK is essential for blood coagulation and assembly of the kallikrein-kinin system. HMWK interacts with Factor XII, Factor XI and prekallikrein where it acts as a cofactor to initiate the contact activation (intrinsic) pathway of coagulation. HMWK is not enzymatically active, but functions as a cofactor for the activation of kallikrein, factor XII and activation of factor XI by factor XIIa. GWAS have identified SNPs at the *KNG1* locus (**rs5030062** and rs710446, both in strong LD) that associate with des-arg(9) bradykinin levels, Factor XI plasma levels and aPTT<sup>55-57</sup>.

---

|                |                                                                                                                                                                                                                                                                                                                                                                                                                                                                                                                                                                                                                                                                                                                                                                                                                                                                                                                                                                                                                                                                                                                                                                                                                                                                                                                                                      |
|----------------|------------------------------------------------------------------------------------------------------------------------------------------------------------------------------------------------------------------------------------------------------------------------------------------------------------------------------------------------------------------------------------------------------------------------------------------------------------------------------------------------------------------------------------------------------------------------------------------------------------------------------------------------------------------------------------------------------------------------------------------------------------------------------------------------------------------------------------------------------------------------------------------------------------------------------------------------------------------------------------------------------------------------------------------------------------------------------------------------------------------------------------------------------------------------------------------------------------------------------------------------------------------------------------------------------------------------------------------------------|
| <i>LGALS3</i>  | Galectin-3 (Gal-3) is a multifunctional protein of an expanding family of $\beta$ -galactoside-binding animal lectins, mainly produced by macrophages and monocytes. It is implicated in a variety of biologic events, such as inflammation, angiogenesis and fibrotic disorders. Gal-3 is broadly expressed in various tissues and secreted into the extracellular matrix and circulation. Increased circulating levels of galectin-3 have been associated with various diseases, including cancer, immunological disorders, and heart failure. A GWAS of plasma galectin-3 levels identified <b>rs2274273</b> (a non-coding variant in LD with missense variants in <i>LGALS3</i> ) as associated with reduced levels of circulating galectin-3 <sup>71</sup> . No specific disease associations have been reported for this variant.                                                                                                                                                                                                                                                                                                                                                                                                                                                                                                              |
| <i>PNPLA3</i>  | Patatin-like phospholipase domain-containing protein 3 (PNPLA3) also known as adiponutrin, acylglycerol O-acyltransferase or calcium-independent phospholipase A2-epsilon (iPLA2-epsilon), is an enzyme primarily expressed in the liver and adipose which partitions between membranes and lipid droplets. PNPLA3 hydrolyzes acylglycerols with maximal activity against triacylglycerol, diacylglycerol, and monoacylglycerol. A polymorphism ( <b>rs738409</b> , p.I148M) in <i>PNPLA3</i> has been associated with Alcoholic and Non-alcoholic Fatty Liver Disease (NAFLD), Non-alcoholic Steatohepatitis (NASH), Liver Cirrhosis, Hepatic Cell Carcinoma, and Type 2 diabetes, although the mechanistic basis for these associations is not entirely resolved <sup>72-76</sup> . <i>Pnlpa3</i> knockout mice failed to demonstrate significant increases in liver fat. Overexpressing human PNPLA3 in mouse liver did not increase steatosis, but overexpression of the human p.I148M variant did recapitulate the fatty liver phenotype in mice, and metabolic studies suggested a complex mechanism <sup>75</sup> . Knock-in of the human p.I148M variant at endogenous levels showed that accumulation of triacylglycerides in the liver is associated with an enrichment of catalytically inactive PNPLA3 on lipid droplets <sup>76</sup> . |
| <i>SLC30A8</i> | Solute carrier family 30, member 8 ( <i>SLC30A8</i> , or <i>Znt8</i> ) is a zinc transporter highly expressed in the pancreas and implicated in insulin secretion in humans. Early GWAS studies by Sladek et al. <sup>77</sup> associated the missense allele Arg325Trp ( <b>rs13266634</b> ) with susceptibility to T2D. The T2D risk allele was shown to increase fasting proinsulin, fasting insulin and fasting glucose, and was found associated with lower insulinogenic index and HOMA derived $\beta$ -cell function, suggesting a defect in $\beta$ -cell insulin processing, secretion or insulin clearance. Humans homozygous for the diabetes risk variant exhibited a post-oral glucose increase in the C-peptide:insulin ratio. Functional studies of the p.Arg325Trp risk variant have reported conflicting effects on zinc transporter activity. However, in 2014, large scale sequencing of <i>SLC30A8</i> in multiple populations demonstrated that heterozygosity for truncating LOF mutations in <i>SLC30A8</i> results in substantial protection from the risk of T2D <sup>78</sup> .                                                                                                                                                                                                                                           |

#### ***D. Neurodegeneration***

|              |                                                                                                                                                                                                                                                                                                          |
|--------------|----------------------------------------------------------------------------------------------------------------------------------------------------------------------------------------------------------------------------------------------------------------------------------------------------------|
| <i>LRRK2</i> | Mutations in <i>LRRK2</i> are the most common genetic cause of both familial and sporadic Parkinson's disease (PD). The most common PD mutation, p.G2019S (rs34637584), located within the LRRK2 kinase domain, causes autosomal dominant PD. G2019S increases kinase activity, auto-phosphorylation and |
|--------------|----------------------------------------------------------------------------------------------------------------------------------------------------------------------------------------------------------------------------------------------------------------------------------------------------------|

---

phosphorylation of generic substrates, and is enriched in Ashkenazi Jews and North African Arab Berbers<sup>79</sup>. Non-coding variants at the *LRRK2* locus (e.g., **rs1491942**) are associated with increased *LRRK2* expression in multiple cell types and increased risk of sporadic PD through GWAS<sup>80</sup>. Together, the genetic and functional data suggest that inhibition of LRRK2's kinase function is a potential therapeutic mechanism for the treatment of PD patients with the G2019S mutation, and perhaps more broadly patients with PD due to other etiologies. Both, p.G2019S and another coding variant, **rs11564187** (p.N2081D), are also unequivocally associated with risk of CD and UC<sup>3,9</sup>.

---

*TMEM175* GWAS and conditional analyses identified **rs34311866** (p.M393T) and **rs34884217** (p.Q65P) within *TMEM175* at the *GAK/TMEM175/DGKQ* locus as associated with the risk of PD<sup>80</sup>. *TMEM175* is a lysosomal potassium channel that regulates lysosomal K(+) permeability<sup>81</sup>. Deficiency for *TMEM175* in neuronal cells impairs lysosomal function and increases  $\alpha$ -synuclein aggregation<sup>82</sup>. Modification of *TMEM175*'s K(+) channel activity is considered a potential therapeutic mechanism for the treatment of PD patients.

---



## Supplementary Notes

### Supplementary Note 1. List of published studies in the Genomics plc GWAS database used in this study

- Berndt, SI. et al. Genome-wide meta-analysis identifies 11 new loci for anthropometric traits and provides insights into genetic architecture. *Nat Genet.* **45**, 501-12. doi: 10.1038/ng.2606. (2013).
- Bradfield, JP. et al. A genome-wide association meta-analysis identifies new childhood obesity loci. *Nat Genet.* **44**, 526-31. doi: 10.1038/ng.2247. (2012). ([www.egg-consortium.org](http://www.egg-consortium.org))
- Buch, S. et al. A genome-wide association study confirms PNPLA3 and identifies TM6SF2 and MBOAT7 as risk loci for alcohol-related cirrhosis. *Nat Genet.* **47**, 1443-8. doi: 10.1038/ng.3417. (2015).
- CONVERGE consortium et al. Sparse whole-genome sequencing identifies two loci for major depressive disorder. *Nature.* **523**, 588-91. doi: 10.1038/nature14659. (2015).
- Cordell, HJ. et al. International genome-wide meta-analysis identifies new primary biliary cirrhosis risk loci and targetable pathogenic pathways. *Nat Commun.* **6**, 8019. doi: 10.1038/ncomms9019. (2015).
- Coronary Artery Disease (C4D) Genetics Consortium et al. A genome-wide association study in Europeans and South Asians identifies five new loci for coronary artery disease. *Nat Genet.* **43**, 339-44. doi: 10.1038/ng.782. (2011).
- Evans, DM. et al. Interaction between ERAP1 and HLA-B27 in ankylosing spondylitis implicates peptide handling in the mechanism for HLA-B27 in disease susceptibility. *Nat Genet.* **43**, 761-7. doi: 10.1038/ng.873. (2011).
- Fogh, I. et al. A genome-wide association meta-analysis identifies a novel locus at 17q112 associated with sporadic amyotrophic lateral sclerosis. *Hum Mol Genet.* **23**, 2220-31. doi: 10.1093/hmg/ddt587. (2014).
- Gaulton, KJ. et al. Genetic fine mapping and genomic annotation defines causal mechanisms at type 2 diabetes susceptibility loci. *Nat Genet.* **47**, 1415-25. doi: 10.1038/ng.3437. (2015).
- Genetic Analysis of Psoriasis Consortium & the Wellcome Trust Case Control Consortium 2 et al. A genome-wide association study identifies new psoriasis susceptibility loci and an interaction between HLA-C and ERAP1. *Nat Genet.* **42**, 985-90. doi: 10.1038/ng.694. (2010).
- International Consortium for Systemic Lupus Erythematosus Genetics (SLEGEN) et al. Genome-wide association scan in women with systemic lupus erythematosus identifies susceptibility variants in ITGAM, PDK, KIAA1542 and other loci. *Nat Genet.* **40**, 204-10. doi: 10.1038/ng.81. (2008).
- International Multiple Sclerosis Genetics Consortium et al. Genetic risk and a primary role for cell-mediated immune mechanisms in multiple sclerosis. *Nature.* **476**, 214-9. doi: 10.1038/nature10251. (2011).
- International Stroke Genetics Consortium (ISGC) et al. Genome-wide association study identifies a variant in HDAC9 associated with large vessel ischemic stroke. *Nat Genet.* **44**, 328-33. doi: 10.1038/ng.1081. (2012).
- Lambert, JC. et al. Meta-analysis of 74,046 individuals identifies 11 new susceptibility loci for Alzheimer's disease. *Nat Genet.* **45**, 1452-8. doi: 10.1038/ng.2802. (2013).
- Liu, JZ. et al. Association analyses identify 38 susceptibility loci for inflammatory bowel disease and highlight shared genetic risk across populations. *Nat Genet.* **47**, 979-86. doi: 10.1038/ng.3359. (2015).

- Mells, GF. et al. Genome-wide association study identifies 12 new susceptibility loci for primary biliary cirrhosis. *Nat Genet.* **43**, 329-32. doi: 10.1038/ng.789. (2011).
- Moffatt, MF. et al. A large-scale, consortium-based genomewide association study of asthma. *N Engl J Med.* **363**, 1211-21. doi: 10.1056/NEJMoa0906312. (2010).
- Morris, AP. et al. Large-scale association analysis provides insights into the genetic architecture and pathophysiology of type 2 diabetes. *Nat Genet.* **44**, 981-90. doi: 10.1038/ng.2383. (2012).
- Nair, RP. et al. Genome-wide scan reveals association of psoriasis with IL-23 and NF-kappaB pathways. *Nat Genet.* **41**, 200-204. doi: 10.1038/ng.311. (2009). (dbGaP accession number phs000019)
- Okada, Y. et al. Genetics of rheumatoid arthritis contributes to biology and drug discovery. *Nature.* **506**, 376-81. doi: 10.1038/nature12873. (2014).
- Otowa, T. et al. Meta-analysis of genome-wide association studies of anxiety disorders. *Mol Psychiatry.* **21**, 1391-9. doi: 10.1038/mp.2015.197. (2016).
- Patsopoulos, NA. et al. Genome-wide meta-analysis identifies novel multiple sclerosis susceptibility loci. *Ann Neurol.* **70**, 897-912. doi: 10.1002/ana.22609. (2011).
- Pattaro, C. et al. Genetic associations at 53 loci highlight cell types and biological pathways relevant for kidney function. *Nat Commun.* **7**, 10023. doi: 10.1038/ncomms10023. (2016).
- Schunkert, H. et al. Large-scale association analysis identifies 13 new susceptibility loci for coronary artery disease. *Nat Genet.* **43**, 333-8. doi: 10.1038/ng.784. (2011).  
(www.CARDIOGRAMPLUSC4D.ORG)
- Tobacco and Genetics Consortium et al. Genome-wide meta-analyses identify multiple loci associated with smoking behavior. *Nat Genet.* **42**, 441-7. doi: 10.1038/ng.571. (2010).
- UK IBD Genetics Consortium et al. Genome-wide association study of ulcerative colitis identifies three new susceptibility loci, including the HNF4A region. *Nat Genet.* **41**, 1330-4. doi: 10.1038/ng.483. (2009).
- UK Parkinson's Disease Consortium et al. Dissection of the genetics of Parkinson's disease identifies an additional association 5' of SNCA and multiple associated haplotypes at 17q21. *Hum Mol Genet.* **20**, 345-53. doi: 10.1093/hmg/ddq469. (2011).
- Wellcome Trust Case Control Consortium et al. Genome-wide association study of 14,000 cases of seven common diseases and 3,000 shared controls. *Nature.* **447**, 661-78. doi: 10.1038/nature05911. (2007).

## Supplementary Figures

**A**

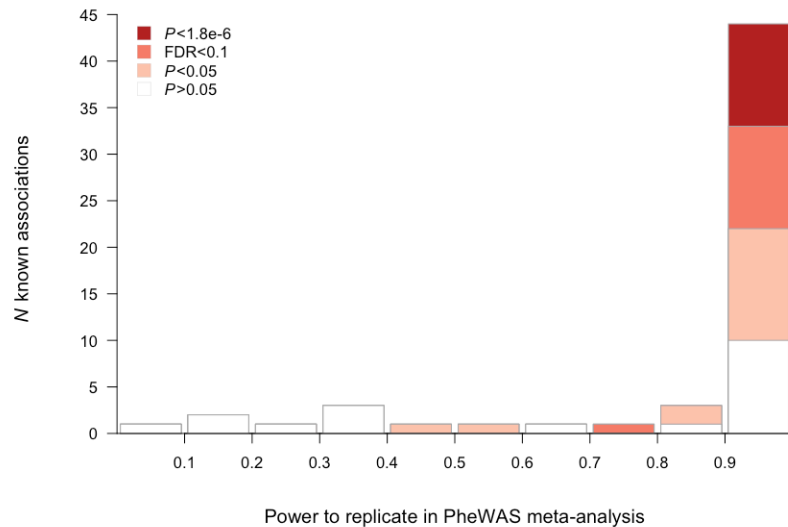

**B**

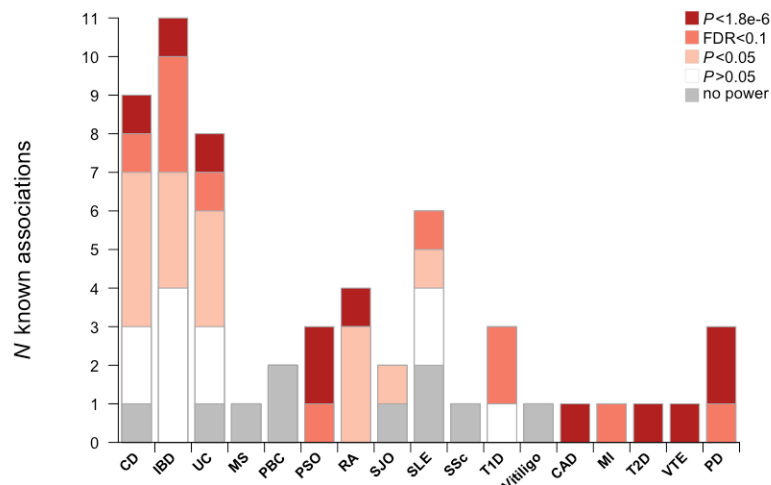

**Supplementary Fig. 1. Replication of known GWAS associations through meta-analysis of PheWAS results from four disease-agnostic cohorts with extensive health information.** (A) Distribution of replication rate based on statistical power to detect an association. Power to replicate at  $P < 0.05$  is shown. Power is calculated based on the SNP frequency, the direction and point estimate of effect size of the SNP in published studies, the number of cases and controls in the meta-analysis, and a disease prevalence of 1%. (B) Number of known GWAS associations that replicated or failed to replicate in the PheWAS meta-analysis, segregated by disease. The published Parkinson's disease (PD) GWAS included 23andMe results.

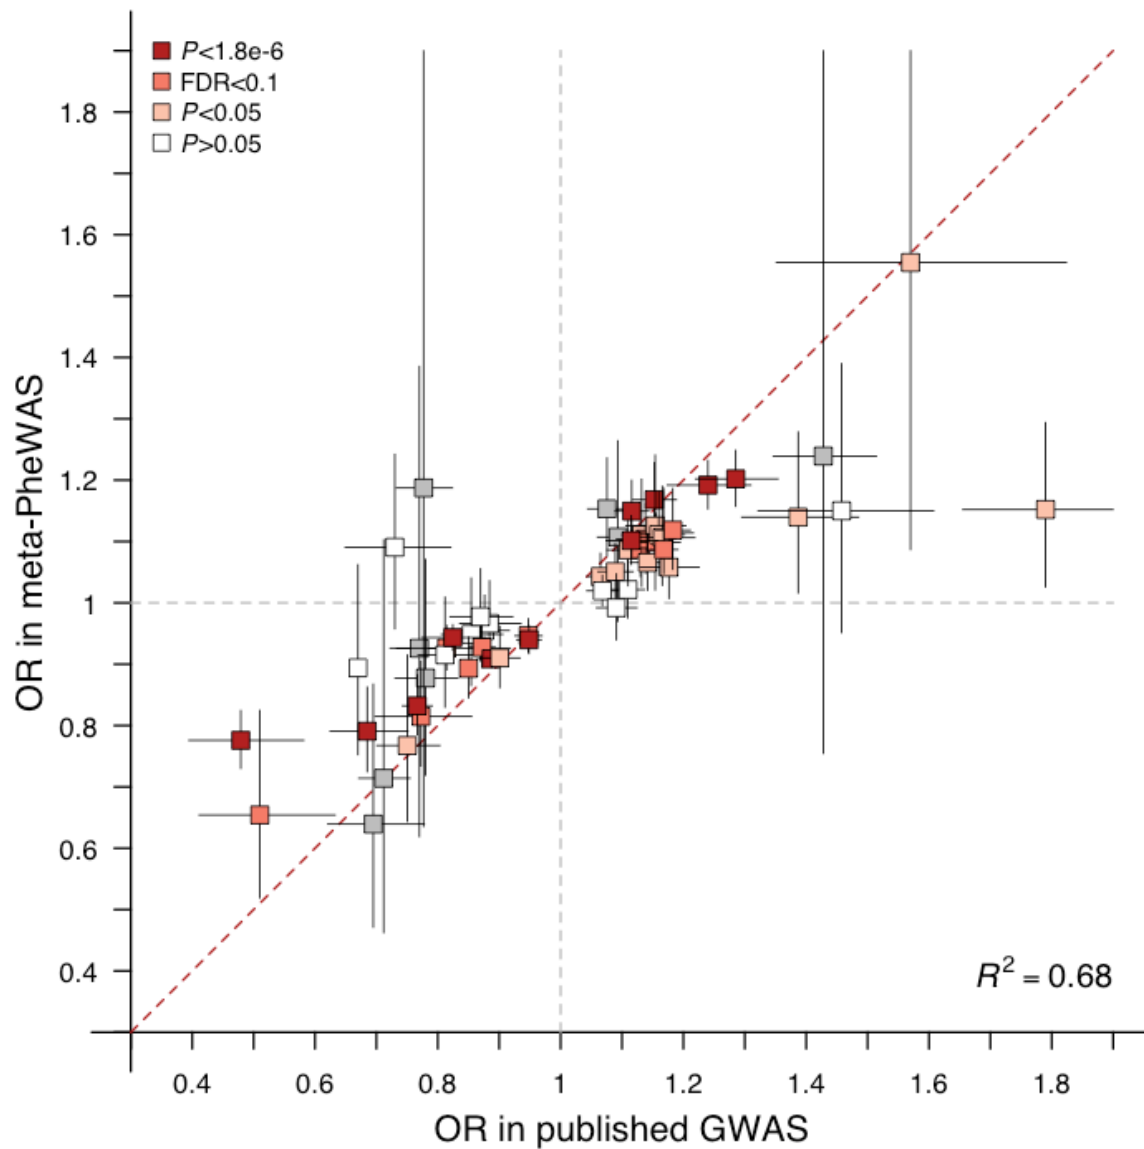

**Supplementary Fig. 2. Effect sizes of known GWAS associations in the meta-PheWAS.** Odds ratios (ORs) and 95% confidence intervals in the published GWAS are shown on the x axis. ORs and 95% confidence intervals in the meta-PheWAS are shown on the y axis. Powered associations ( $\beta < 0.8$ ,  $\alpha = 0.05$ ) reaching  $P < 1.8 \times 10^{-6}$  (Bonferroni corrected pvalue),  $FDR < 0.1$  or  $P < 0.05$  in meta-PheWAS are shown in dark red, red and light red respectively. Powered associations not reaching  $P < 0.05$  in meta-PheWAS are shown in white. Associations not powered in the meta-PheWAS are shown in grey. The regression coefficient  $R^2$  between published ORs and ORs in meta-PheWAS is indicated.

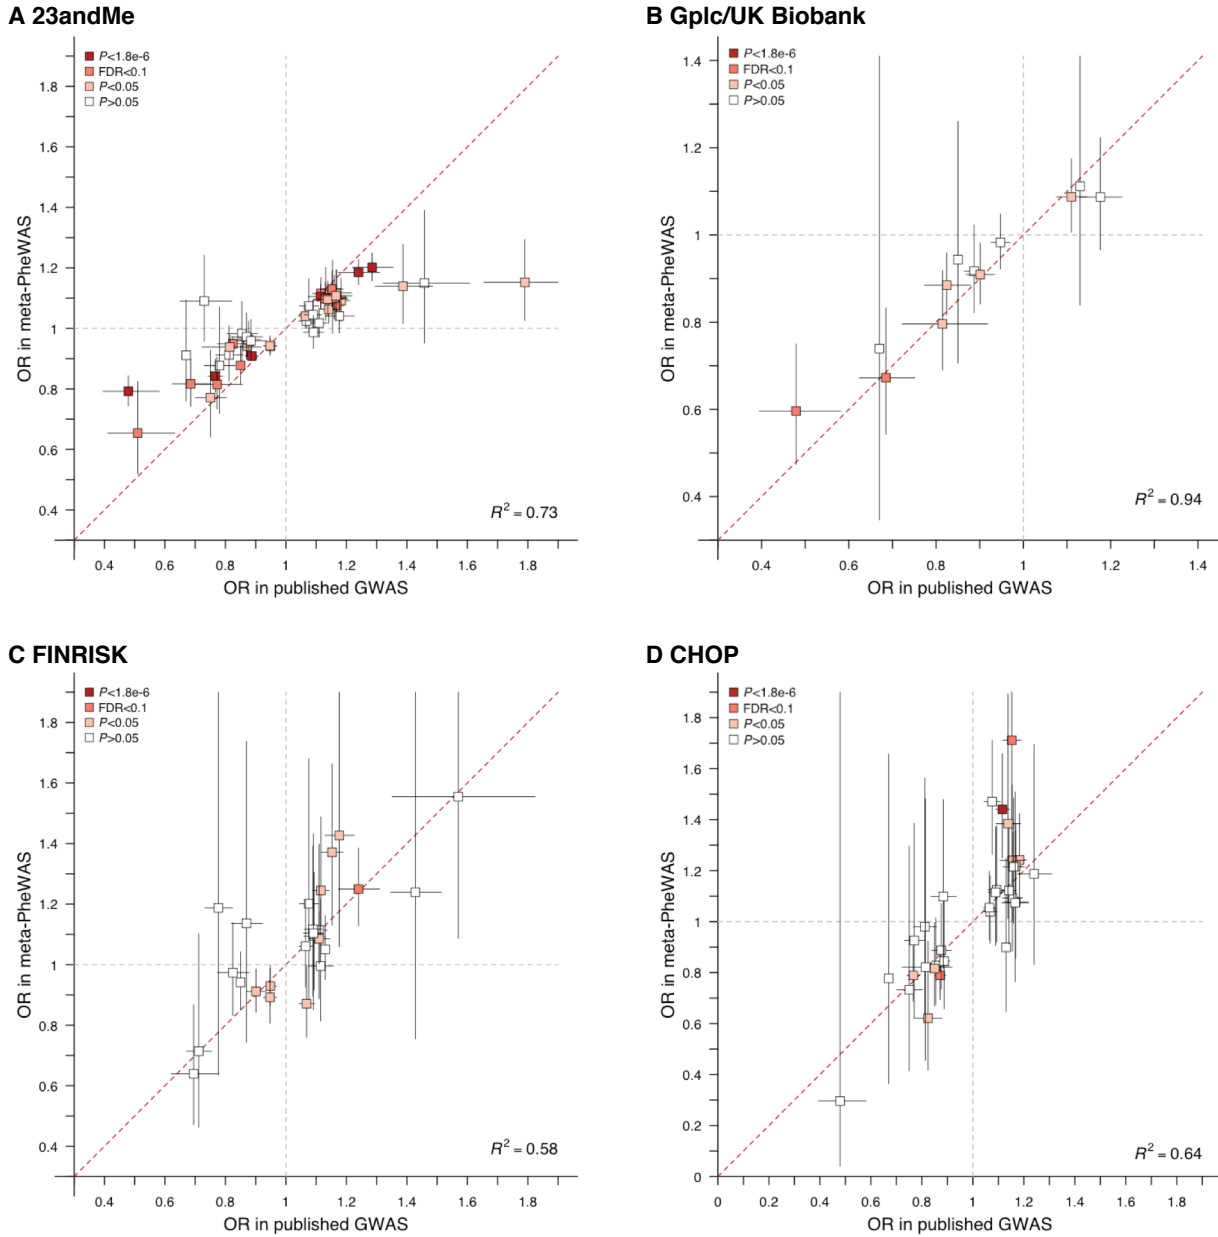

**Supplementary Fig. 3. Effect sizes of known GWAS associations in the disease-agnostic cohorts PheWAS.**

Odds ratios (ORs) and 95% confidence intervals in the published GWAS are shown on the x axis. ORs and 95% confidence intervals in 23andMe (A), Gplc/UK Biobank (B), FINRISK (C) and CHOP (D) are shown on the y axis. Associations reaching  $P < 1.8 \times 10^{-6}$  (Bonferroni corrected pvalue),  $FDR < 0.1$  or  $P < 0.05$  in the PheWAS are shown in dark red, red and light red respectively. Associations not reaching  $P < 0.05$  are shown in white. The regression coefficients  $R^2$  between published ORs and ORs in meta-PheWAS are indicated.

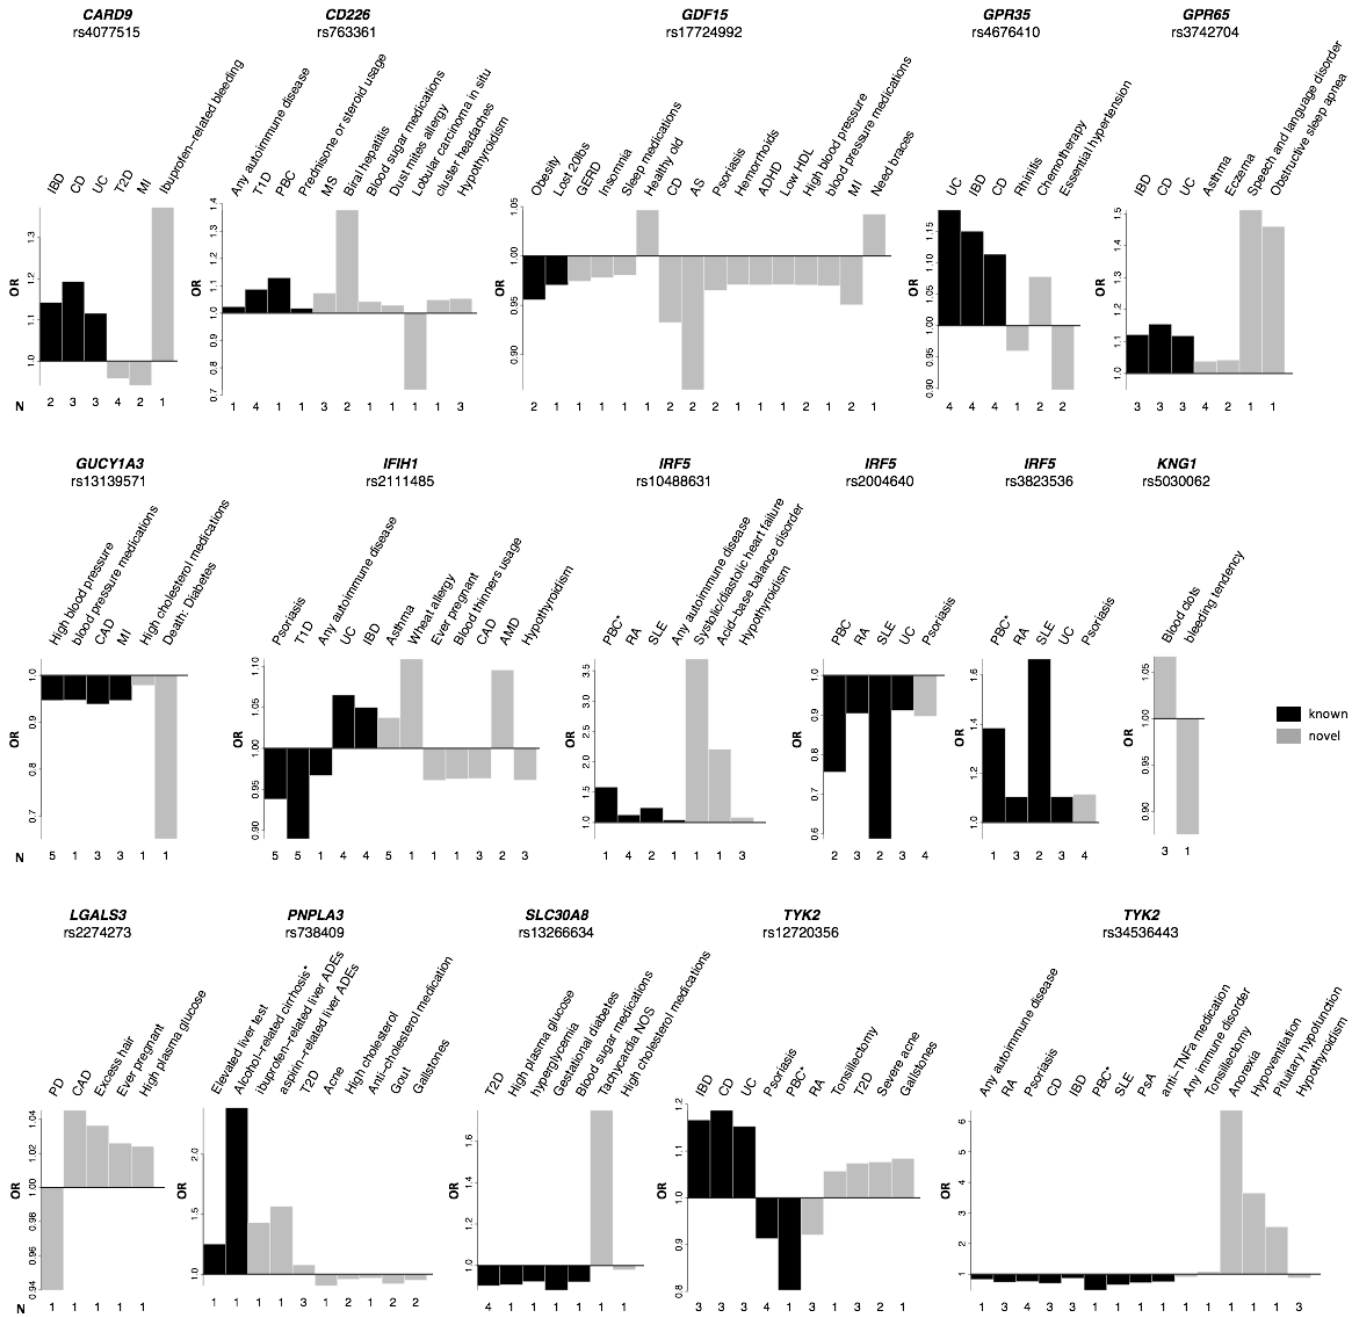

**Supplementary Fig. 4. Effects of replicated and putative novel associations (FDR<0.1).** Sixteen SNPs showed novel associations at FDR<0.1 ( $P < 7e-4$ ) in the meta-analysis of PheWAS and GWAS results. Effects (Odds ratio, OR) of the replicated known (black) and novel (grey) associations reaching FDR<0.1 are shown. The number (N) of disease-agnostic and GWAS cohorts contributing to a respective phenotype is indicated. \*, Result derived from GWAS cohort only since the corresponding phenotype is not captured or not powered in the disease-agnostic cohorts tested.

**A  $P < 40\%$**

*CARD9* rs4077515 / Heart\_attack  
 $I^2 = 3.75$

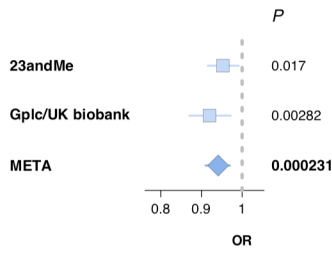

*CARD9* rs4077515 / T2D  
 $I^2 = 0$

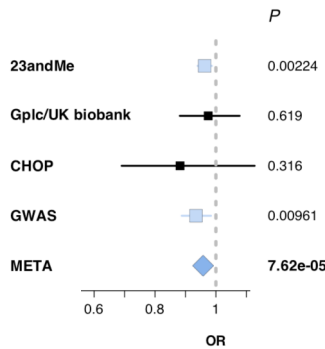

*CD226* rs763361 / Hypothyroidism  
 $I^2 = 0$

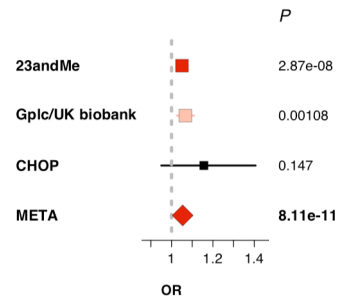

*CD226* rs763361 / Multiple\_sclerosis  
 $I^2 = 0$

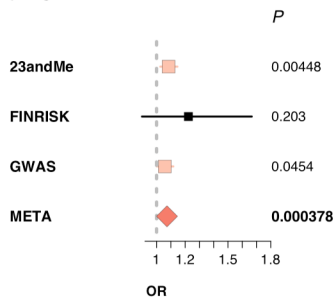

*CD226* rs763361 / Viral\_hepatitis  
 $I^2 = 39.93$

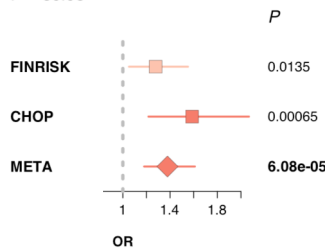

*GDF15* rs17724992 / Acid\_reflux  
 $I^2 = 0$

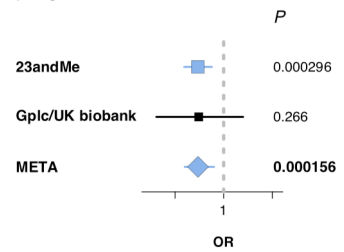

*GDF15* rs17724992 / Ankylosing\_spondyliti  
 $I^2 = 0$

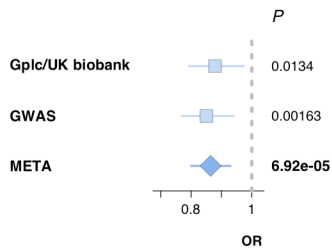

*GDF15* rs17724992 / CAD  
 $I^2 = 0$

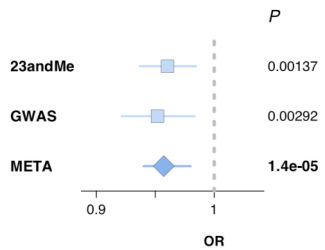

*GDF15* rs17724992 / Crohns\_disease  
 $I^2 = 0$

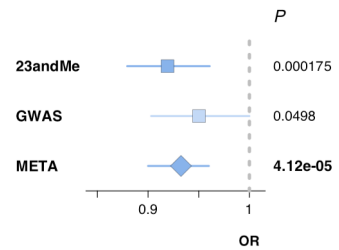

*GDF15* rs17724992 / Heart\_attack  
 $I^2 = 0.51$

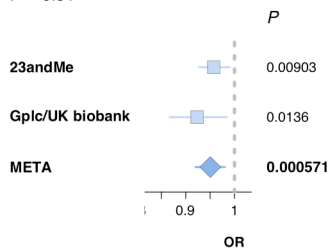

*GDF15* rs17724992 / Psoriasis  
 $I^2 = 0$

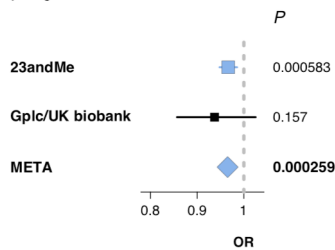

*GPR35* rs4676410 / Chemotherapy  
 $I^2 = 0$

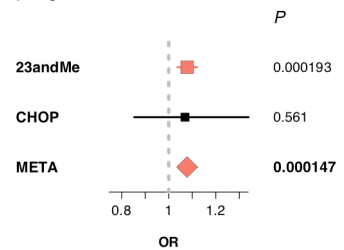

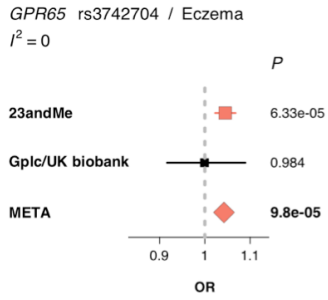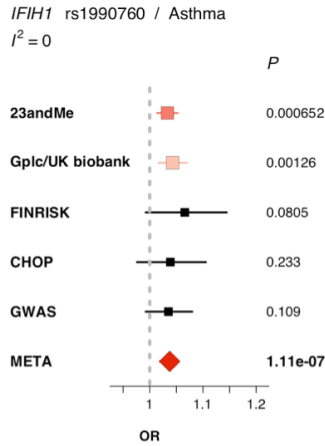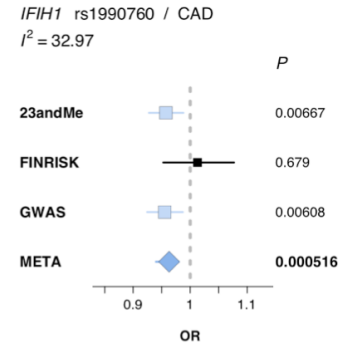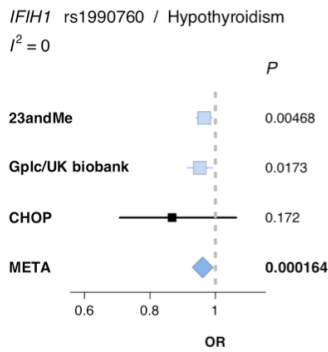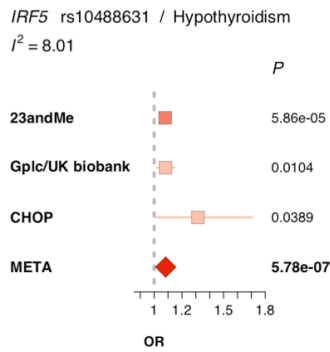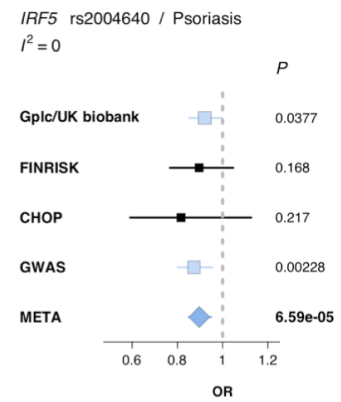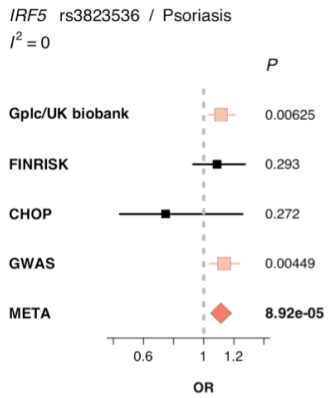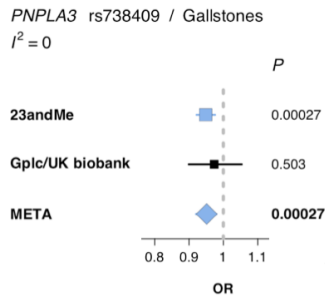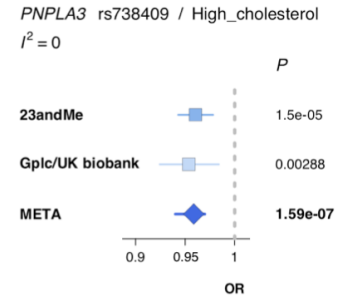



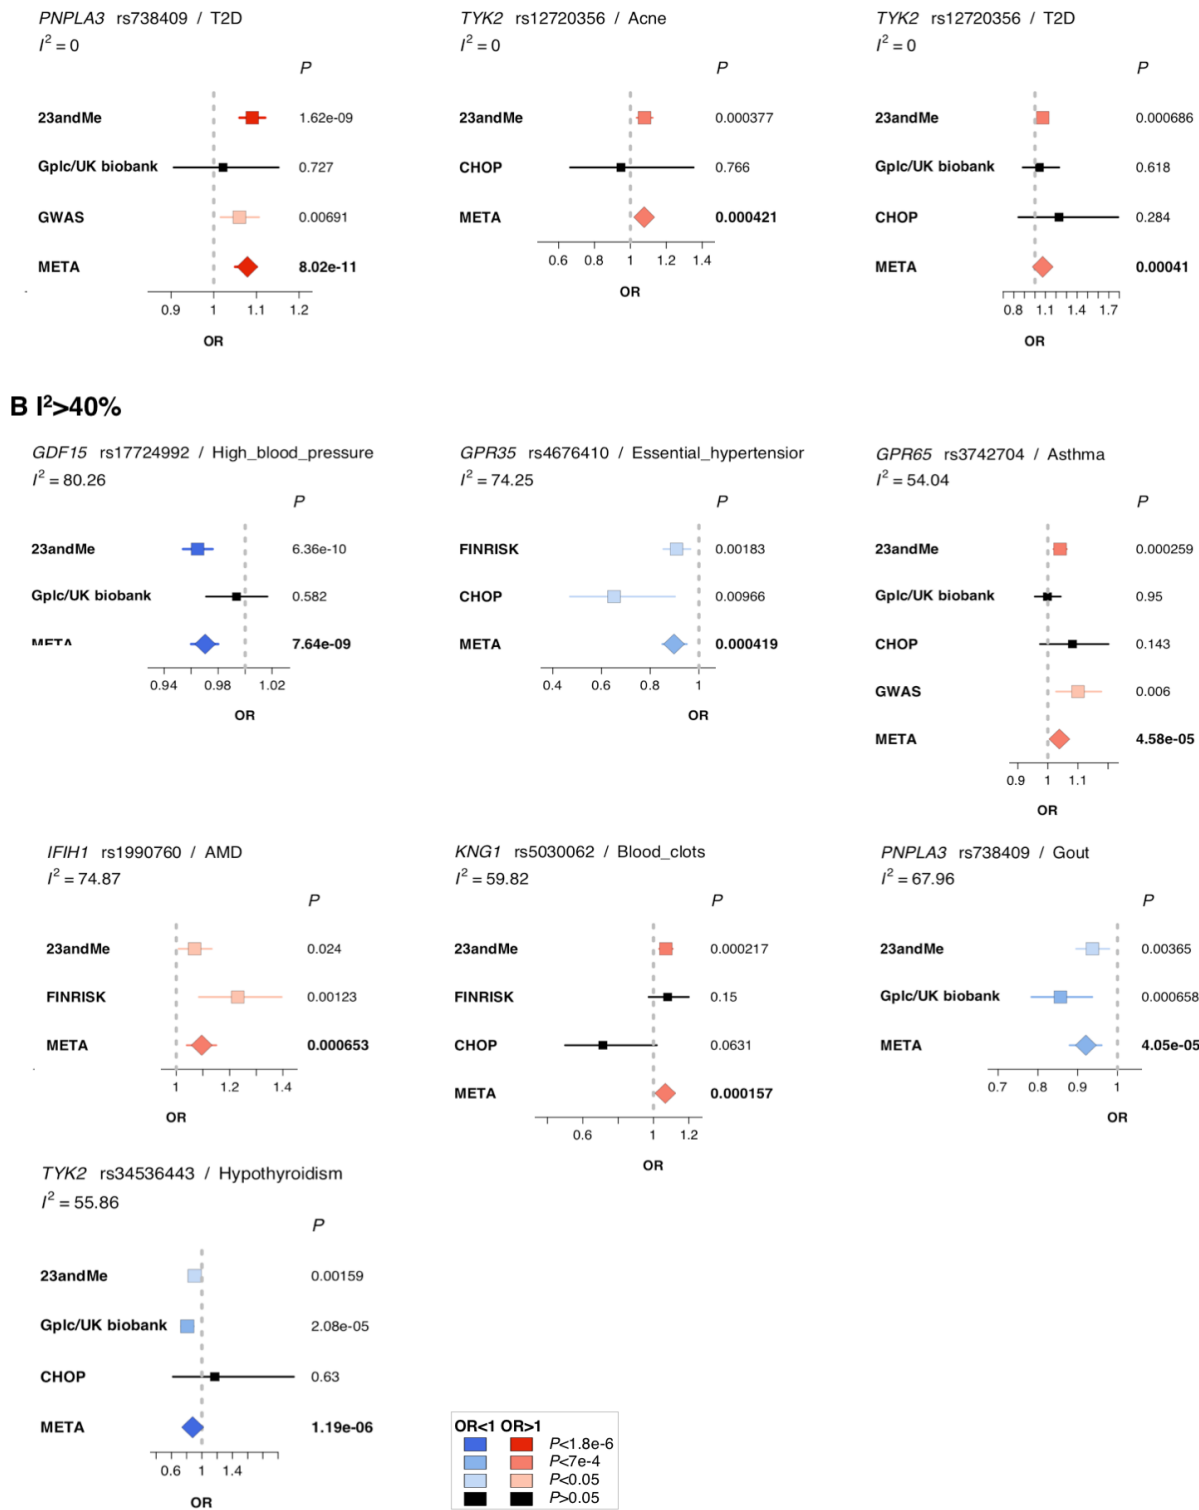

**Supplementary Fig. 5. Effect sizes of putative novel associations observed in the individual cohorts and in the meta-analysis.** 31 putative novel associations were obtained by meta-analyzing associations results from the disease-agnostic cohorts with GWAS results. Odds ratios (OR), 95% confidence intervals and  $P$  values are shown. **A.** Heterogeneity  $I^2$  statistic <40%. **B.**  $I^2 > 40\%$ .

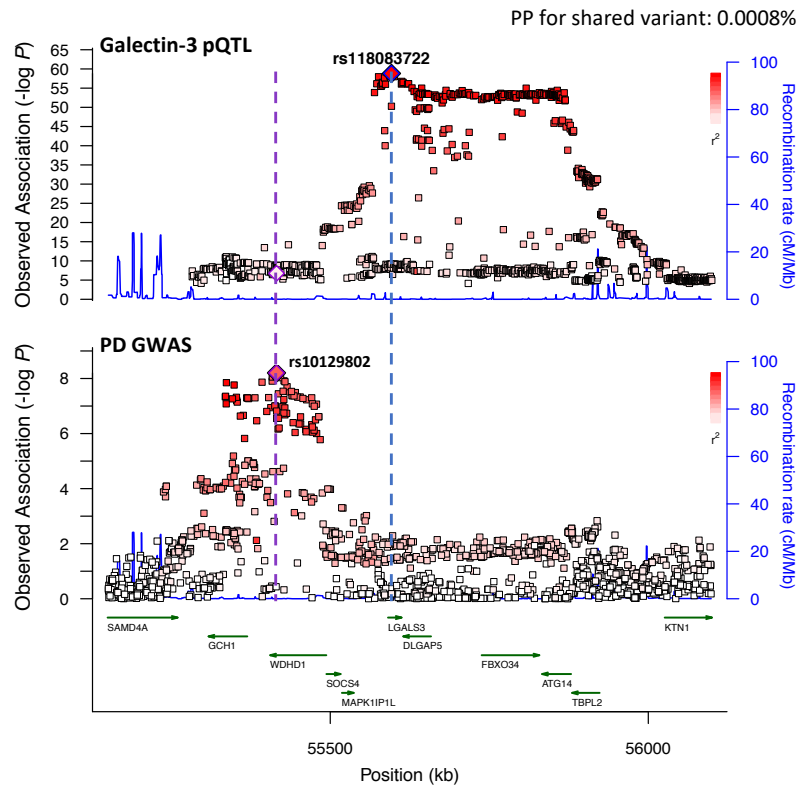

**Supplementary Fig. 6. Independent associations for galectin-3 plasma levels and Parkinson’s disease risk at the *GCHI-LGALS3* locus.** Regional association results at the *GCHI-LGALS3* demonstrate that the associations with circulating plasma galectin-3 levels (top panel) and Parkinson’s disease (PD, bottom panel) risk are driven by different causal SNPs. Co-localization test using *coloc* returns a posterior probability (PP) for a shared variant of 0.0008%.

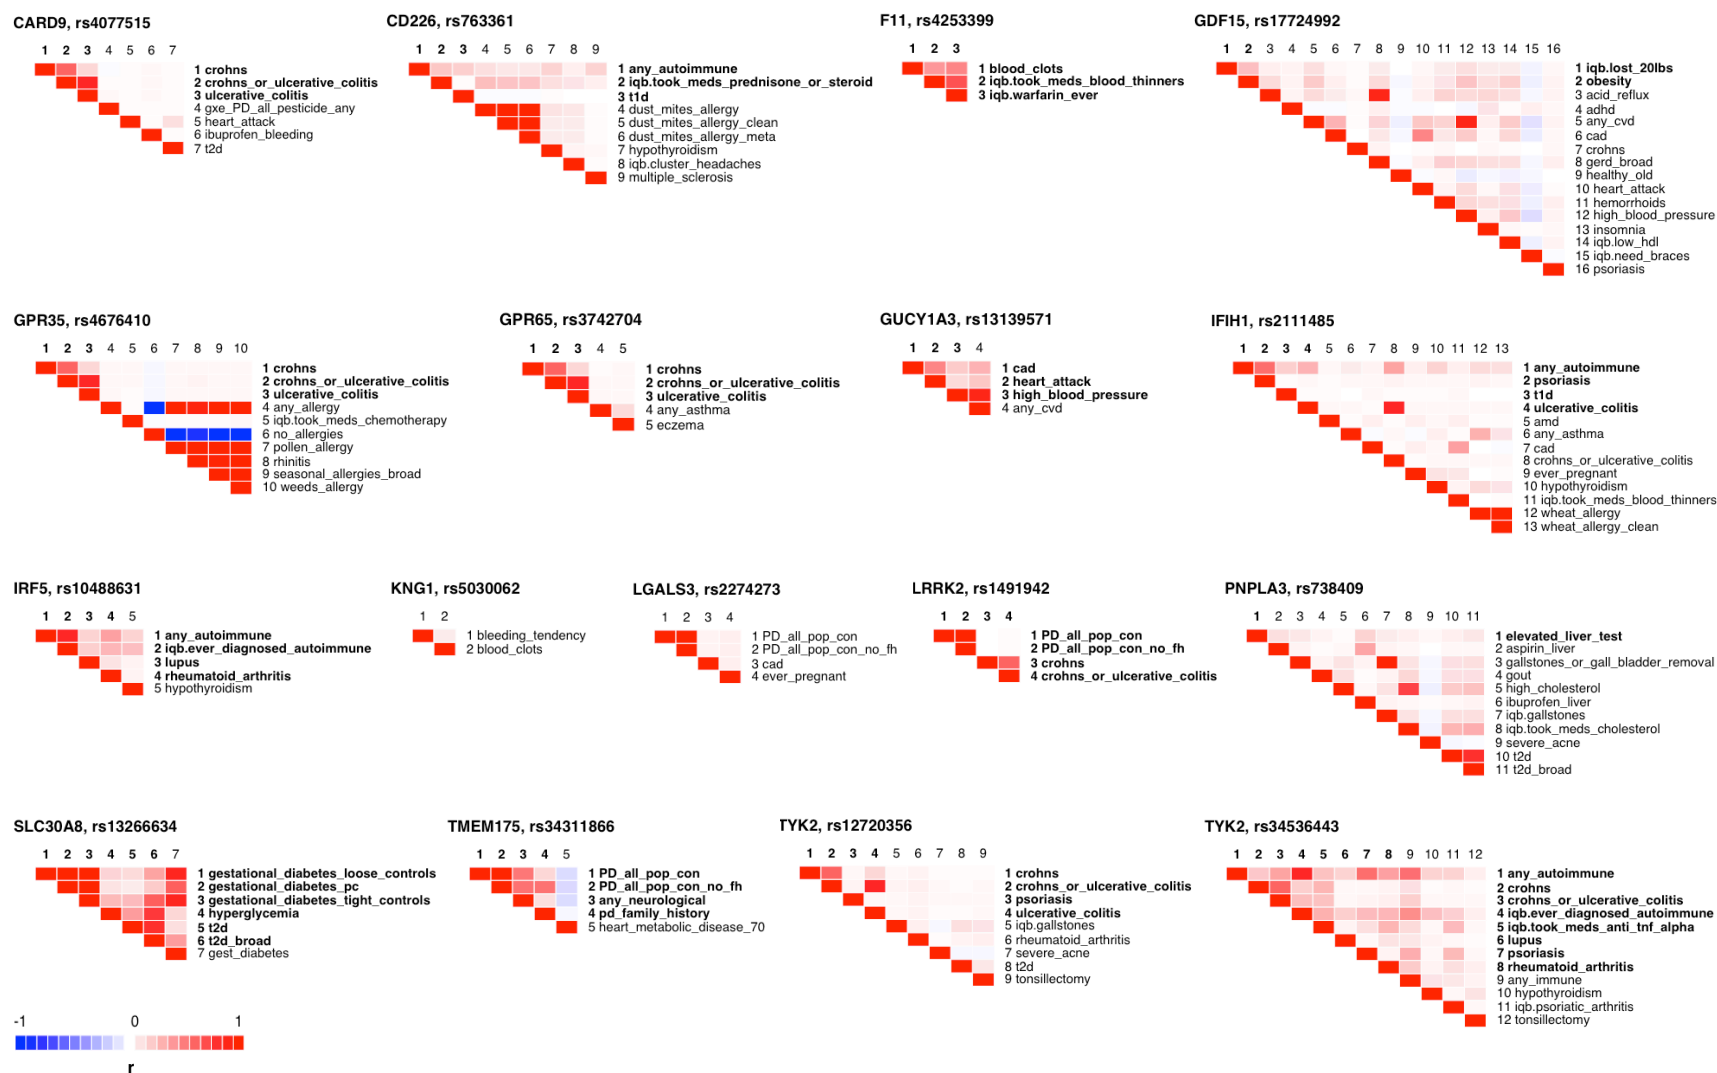

**Supplementary Fig. 7. Phenotype-phenotype correlations in 23andMe.** Pairwise phenotype correlation was calculated in participants for whom data on both phenotypes was available through  $r = \text{cov} / \sqrt{\text{var}_1 * \text{var}_2}$ , with  $\text{cov}$ =covariance of phenotype 1 and phenotype 2,  $\text{var}_1$ =variance in phenotype 1,  $\text{var}_2$ =variance of phenotype 2. Only phenotypes associated at  $\text{FDR} < 0.1$  with indicated SNPs are shown. Phenotypes related to known associations are highlighted in bold.

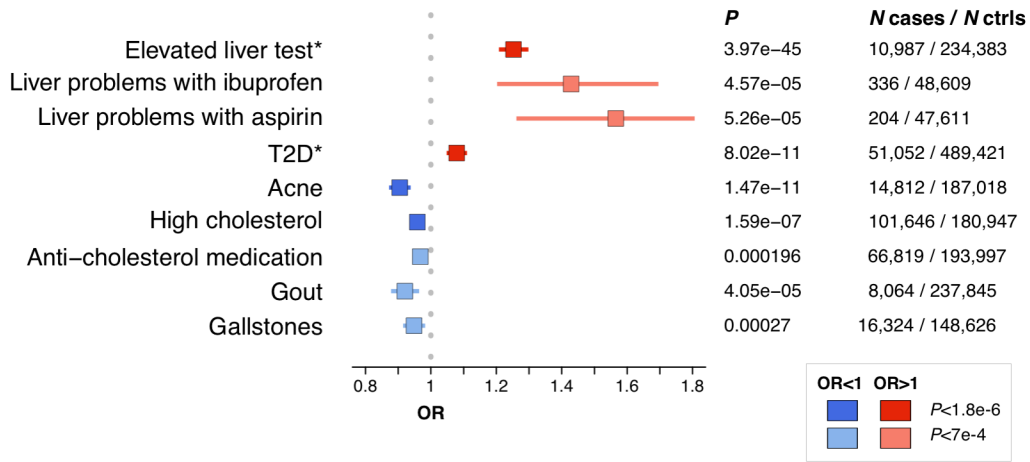

**Supplementary Fig. 8. Association of *PNPLA3* rs738409-G with multiple disease-relevant endpoints.** Associations reaching FDR<0.1 in joint meta-analysis of PheWAS results with available GWAS results are shown. Odds ratios, 95% confidence intervals, *P* values, and numbers (*N*) of cases and controls are represented. Known GWAS associations are indicated with an asterisk (\*).

## Supplementary Tables

**Supplementary Table 1. SNP-phenotype associations reported earlier in published GWAS for the 25 SNPs interrogated through PheWAS in this study**

| Reported Gene  | SNP        | Phenotype <sup>s</sup>    | BETA <sup>^</sup> | P value  | Phenotype testable in PheWAS | Reference |
|----------------|------------|---------------------------|-------------------|----------|------------------------------|-----------|
| <i>ATG16L1</i> | rs13391356 | Crohn's disease           | -0.211            | 4.2e-70  | yes                          | 3         |
|                |            | IBD                       | -0.136            | 5.9e-35  | yes                          | 3         |
| <i>CARD9</i>   | rs11145766 | IBD                       | -0.194            | 4.1e-22  | yes                          | 3         |
|                |            | Crohn's disease           | -0.192            | 7.5e-19  | yes                          | 3         |
|                |            | Ulcerative colitis        | -0.141            | 1.9e-11  | yes                          | 3         |
|                |            | Crohn's disease           | 0.168             | 3.23e-43 | yes                          | 36        |
| <i>CARD9</i>   | rs4077515  | IBD                       | 0.155             | 1.27e-53 | yes                          | 36        |
|                |            | Ulcerative colitis        | 0.132             | 1.02e-25 | yes                          | 36        |
|                |            | Crohn's disease           | 0.122             | 1.8e-11  | yes                          | 14        |
| <i>CD226</i>   | rs763361   | IBD                       | 0.0558            | 4.7e-09  | yes                          | 36        |
|                |            | Mean platelet volume*     | -0.007            | 3.36e-11 |                              | 15        |
|                |            | Asthma (childhood onset)  | 0.231             | 3e-14    | yes                          | 52        |
| <i>CDHR3</i>   | rs6967330  | Asthma (childhood onset)  | 0.231             | 3e-14    | yes                          | 52        |
| <i>F11</i>     | rs4253399  | aPTT*                     | -0.48             | 6e-43    |                              | 56        |
|                |            | VTE                       | 0.215             | 2e-14    | yes                          | 57        |
|                |            | FXI levels*               | 0.088             | 6.22e-08 |                              | 55        |
| <i>F12</i>     | rs2731672  | aPTT*                     | 1.55              | 8.9e-60  |                              | 56        |
|                |            | FXII levels *             | NA                | 1e-7     |                              | 63        |
| <i>GDF15</i>   | rs17724992 | BMI *                     | -0.019            | 3.4e-08  |                              | 65        |
| <i>GPR35</i>   | rs4676410  | Ulcerative colitis        | 0.137             | 2.1e-18  | yes                          | 3         |
|                |            | IBD                       | 0.129             | 8.1e-19  | yes                          | 3         |
|                |            | Crohn's disease           | 0.095             | 3.2e-08  | yes                          | 3         |
| <i>GPR65</i>   | rs3742704  | Crohn's disease           | 0.155             | 9.41e-14 | yes                          | 36        |
|                |            | IBD                       | 0.144             | 7.29e-17 | yes                          | 36        |
|                |            | Ulcerative colitis        | 0.129             | 2.16e-09 | yes                          | 36        |
| <i>GUCY1A3</i> | rs13139571 | Blood pressure **         | -0.26             | 2.2e-10  | yes **                       | 68        |
|                |            | CAD                       | -0.052            | 9.5e-07  | yes                          | 83        |
|                |            | MI                        | -0.053            | 5.8e-06  | yes                          | 83        |
| <i>IFIH1</i>   | rs2111485  | IgAD                      | 0.67              | 7.3e-10  |                              | 84        |
|                |            | T1D                       | -0.162            | 3.8e-18  | yes                          | 14        |
|                |            | Vitiligo                  | -0.261            | 4.9e-15  | yes                          | 85        |
|                |            | IBD                       | 0.0629            | 4.6e-09  | yes                          | 36        |
|                |            | Ulcerative colitis        | 0.0854            | 2.11e-10 | yes                          | 36        |
|                |            | SLE                       | -0.139            | 1.27e-11 | yes                          | 35        |
|                |            | Psoriasis                 | -0.131            | 2.7e-08  | yes                          | 47        |
|                |            | SLE                       | 0.582             | 9.4e-45  | yes                          | 35        |
| <i>IRF5</i>    | rs10488631 | Primary biliary cirrhosis | 0.464             | 5.1e-23  | yes                          | 40        |
|                |            | RA                        | 0.163             | 1.3e-11  | yes                          | 38        |
|                |            | Systemic scleroderma      | 0.425             | 1e-10    | yes                          | 41        |
|                |            | Sjogren's syndrome        | 0.451             | 5.4e-16  | yes                          | 39        |
| <i>IRF5</i>    | rs2004640  | Primary biliary cirrhosis | -0.198            | 4.1e-19  | yes                          | 40        |

|                |            |                           |         |           |       |    |
|----------------|------------|---------------------------|---------|-----------|-------|----|
|                |            | RA                        | -0.104  | 4.3e-10   | yes   | 38 |
|                |            | SLE                       | -0.328  | 2.9e-31   | yes   | 35 |
|                |            | Sjogren's syndrome        | -0.314  | 2.9e-14   | yes   | 39 |
| <i>IRF5</i>    | rs3823536  | SLE                       | 0.356   | 5e-36     | yes   | 35 |
|                |            | Primary biliary cirrhosis | 0.199   | 4.1e-19   | yes   | 40 |
|                |            | RA                        | 0.104   | 2.4e-11   | yes   | 38 |
|                |            | Ulcerative colitis        | 0.095   | 4.4e-14   | yes   | 3  |
| <i>KNG1</i>    | rs5030062  | aPTT *                    | -1.19   | 1.1e-185  |       | 56 |
|                |            | FXI levels*               | 0.083   | 1.19e-07  |       | 55 |
| <i>LGALS3</i>  | rs2274273  | galectin-3 plasma levels* | 0.185   | 2.35e-188 |       | 71 |
| <i>LRRK2</i>   | rs11564187 | Crohn's disease           | 0.377   | 6.80e-26  | yes   | 3  |
|                |            | IBD                       | 0.327   | 3.30e-20  | yes   | 3  |
| <i>LRRK2</i>   | rs1491942  | Parkinson's disease       | 0.239   | 6.00e-14  | yes   | 80 |
|                |            | IBD                       | 0.104   | 1.80e-17  | yes   | 36 |
|                |            | Crohn's disease           | 0.124   | 3.51e-17  | yes   | 36 |
|                |            | Ulcerative colitis        | 0.087   | 1.56e-08  | yes   | 36 |
| <i>PNPLA3</i>  | rs738409   | NAFLD                     | 1.18    | 3.6e-43   |       | 73 |
|                |            | Alcohol-related cirrhosis | 0.784   | 2e-48     |       | 86 |
|                |            | CT hepatic steatosis *    | 0.26    | 4.3e-34   |       | 73 |
|                |            | ALT **                    | 0.06    | 1e-45     | yes** | 72 |
| <i>SLC30A8</i> | rs13266634 | Fasting glucose *         | -0.029  | 1.47e-35  |       | 87 |
|                |            | T2D                       | -0.119  | 1.3e-18   | yes   | 88 |
| <i>TMEM175</i> | rs34311866 | Parkinson's disease       | 0.239   | 1e-43     | yes   | 80 |
| <i>TMEM175</i> | rs34884217 | Parkinson's disease       | -0.301  | 1.6e-12   | yes   | 80 |
| <i>TYK2</i>    | rs12720356 | Crohn's disease           | 0.1433  | 3.39e-11  | yes   | 36 |
|                |            | IBD                       | 0.1483  | 4.13e-16  | yes   | 36 |
|                |            | Psoriasis                 | -0.287  | 4e-11     | yes   | 47 |
|                |            | Ulcerative colitis        | 0.1533  | 1.67e-11  | yes   | 36 |
|                |            | SLE                       | -0.314  | 5.1e-09   | yes   | 35 |
| <i>TYK2</i>    | rs34536443 | Primary biliary cirrhosis | -0.653  | 1.2e-12   | yes   | 40 |
|                |            | Psoriasis                 | -0.634  | 9.1e-31   | yes   | 47 |
|                |            | RA                        | -0.378  | 4.6e-16   | yes   | 38 |
|                |            | Multiple sclerosis        | -0.248  | 1.8e-14   | yes   | 48 |
|                |            | SLE                       | -0.673  | 2e-11     | yes   | 35 |
|                |            | T1D                       | -0.4    | 4.4e-15   | yes   | 14 |
|                |            | IBD                       | -0.2087 | 1.83e-13  | yes   | 36 |
|                |            | Crohn's disease           | -0.2872 | 1.86e-16  | yes   | 36 |

§ Significant associations ( $P < 5e-8$ ) in the European population

^ Effect of minor allele

\* Quantitative traits

\*\* Quantitative traits related to binary traits tested in PheWAS: blood pressure and high blood pressure, ALT and elevated liver test

IBD, inflammatory bowel disease; T1D, type 1 diabetes; aPTT, activated partial thromboplastin time; VTE, venous thromboembolism; BMI, body mass index; CAD, Coronary Artery Disease; MI, myocardial Infarction; IgAD, immunoglobulin A Deficiency; SLE, Systemic Lupus Erythematosus; RA, rheumatoid arthritis; NAFLD, Non-alcoholic fatty liver disease; ALT, alanine aminotransferase

**Supplementary Table 2. Examples of mapped phenotypic endpoints**

| <b>Phenotype</b>    | <b>Meta-analyzed mapped endpoints</b>  | <b>Cohort-specific / unmapped endpoints</b>      |
|---------------------|----------------------------------------|--------------------------------------------------|
| Heart attack        | 23andMe - "heart attack"               | 23andMe - "early onset heart attack"             |
|                     | Gplc UK Biobank - "Heart attack"       | FINRISK - "Myocardial infarction"                |
|                     | FINRISK - "IPHG Myocardial infarction" | FINRISK - "Myocardial infarction, strict"        |
| High blood pressure | 23andMe - "high blood pressure"        | 23andMe - "iqb.blood pressure meds"              |
|                     | UK Biobank - "Hypertension"            |                                                  |
|                     | FINRISK - "IPHG Hypertension"          | CHOP - "Elevated blood pressure reading"         |
|                     | CHOP - "Hypertension"                  |                                                  |
| Gall stones         | 23andMe - "iqb.gallstones"             | 23andMe - "gallstones or gall bladder removal"   |
|                     | Gplc UK Biobank - "Gall stones"        | CHOP - "Cholelithiasis and cholecystitis"        |
|                     | CHOP - "Cholelithiasis"                | CHOP - "Cholelithiasis with other cholecystitis" |

Full list of individual phenotypic endpoints that are mapped for meta-analysis is provided in Supplementary Data file 1.

**Supplementary Table 3. Mapped phenotypes found in at least two disease-agnostic cohorts and included in the meta-analysis**

| Phenotype                      | N cases/N controls |                 |            |           |
|--------------------------------|--------------------|-----------------|------------|-----------|
|                                | 23andMe            | Gpic UK Biobank | FINRISK    | CHOP      |
| <b>1. Autoimmune diseases</b>  |                    |                 |            |           |
| Ankylosing spondylitis         | NA                 | 1026/111311     | 119/21173  | 91/13333  |
| Celiac disease                 | 6611/495405        | NA              | 143/21149  | 151/9748  |
| Crohn's disease                | 1867/251313        | NA              | 95/21197   | 577/9748  |
| IBD                            | 5495/246251        | NA              | 430/20862  | 663/9748  |
| SLE                            | 1336/246359        | NA              | 43/21249   | NA        |
| Multiple sclerosis             | 1399/249152        | NA              | 80/21212   | NA        |
| Psoriasis                      | 16001/242065       | 1304/111033     | 325/20967  | 91/12699  |
| Rheumatoid arthritis           | 6568/249421        | 1328/111009     | 1374/19918 | NA        |
| T1D                            | 1607/247438        | 97/112238       | 862/20430  | 239/13377 |
| Ulcerative colitis             | 4069/250210        | NA              | 257/21035  | 205/9748  |
| Vitiligo                       | 963/419015         | NA              | NA         | 56/12934  |
| <b>2. Blood diseases</b>       |                    |                 |            |           |
| Abnormal coagulation profile   | NA                 | NA              | 21/21271   | 41/13024  |
| Anemia                         | 13560/72539        | 197/112140      | NA         | NA        |
| Blood in stool                 | 7113/91512         | NA              | NA         | 111/11360 |
| Coagulation defects            | NA                 | NA              | 56/21236   | 255/13024 |
| Congenital coagulation defects | NA                 | NA              | 20/21272   | 97/13024  |
| Primary thrombocytopenia       | NA                 | NA              | 26/21266   | 72/13024  |
| thrombocytopenia               | NA                 | NA              | 69/21223   | 174/13024 |
| <b>3. Cancers</b>              |                    |                 |            |           |
| Any cancer                     | 67170/485702       | NA              | 2679/18613 | 100/13104 |
| Basal cell carcinoma           | 14480/258540       | 1034/111303     | NA         | NA        |
| Bladder cancer                 | 828/274338         | NA              | 136/21156  | NA        |
| Brain cancer                   | NA                 | NA              | 55/21237   | 124/13601 |
| Breast cancer                  | 5510/133058        | 1843/34552      | 668/20624  | NA        |
| Cervical cancer                | NA                 | 402/58556       | 29/21263   | NA        |
| Chemotherapy                   | 15424/515350       | NA              | NA         | 252/13104 |
| Colorectal cancer              | 1537/276305        | 158/112179      | 259/21033  | NA        |
| Lipoma                         | 21238/127699       | NA              | NA         | 21/13710  |
| Lymphoid leukemia              | NA                 | NA              | 50/21242   | 107/13613 |
| Myeloproliferative neoplasm    | 1978/636034        | NA              | 124/21168  | 22/13613  |
| Non-Hodgkins lymphoma          | 741/272275         | NA              | 143/21149  | 36/13613  |
| Prostate cancer                | 4492/155380        | 833/52270       | 515/20777  | NA        |
| Skin cancer                    | 23439/240977       | NA              | 811/20481  | NA        |
| Thyroid cancer                 | 1270/274127        | NA              | 78/21214   | NA        |



**4. Cardiovascular diseases**

|                                         |               |             |            |           |
|-----------------------------------------|---------------|-------------|------------|-----------|
| Angina                                  | 5394/239601   | 3750/108141 | NA         | NA        |
| CVD                                     | 81672/183219  | NA          | 4279/17013 | NA        |
| Atrial fibrillation                     | 7764/219788   | 874/111463  | 1801/19491 | NA        |
| Blood clots                             | 14254/499076  | NA          | 762/20530  | 70/13468  |
| CAD                                     | 9630/237947   | NA          | 3336/17956 | NA        |
| Cardiomyopathy                          | NA            | NA          | 223/21069  | 63/13681  |
| Deep vein thrombosis                    | NA            | NA          | 203/21089  | 24/13540  |
| Essential hypertension                  | NA            | NA          | 4032/17260 | 160/13408 |
| Heart attack                            | 5499/246683   | 2786/109162 | 1391/19901 | NA        |
| Heart failure                           | 1841/243366   | NA          | 2018/19274 | 65/13104  |
| Heart valve disorders                   | 1399/43647    | 802/111535  | 850/20442  | 120/12830 |
| High blood pressure                     | 121891/385876 | 29847/80466 | 4178/17114 | 202/13408 |
| Hypertensive heart and/or renal disease | NA            | NA          | 492/20800  | 51/13408  |
| Primary/intrinsic cardiomyopathies      | NA            | NA          | 166/21126  | 54/13681  |
| Stroke                                  | 5479/508263   | 1571/110147 | 1907/19385 | NA        |
| Varicose veins                          | 40949/121550  | NA          | NA         | 47/13468  |

**5. Diseases of digestive system**

|                          |               |             |    |            |
|--------------------------|---------------|-------------|----|------------|
| Acid reflux              | 73710/177745  | 5073/107264 | NA | NA         |
| Appendicitis             | 29169/178759  | NA          | NA | 62/13735   |
| Constipation             | 1453/97369    | NA          | NA | 1178/9748  |
| Diverticulitis           | 3077/415429   | 1327/111010 | NA | NA         |
| Gallstones               | 25838/244204  | 1884/110142 | NA | 89/13636   |
| GERD                     | 130860/385247 | NA          | NA | 1758/10420 |
| Hemorrhoids              | 60335/104379  | NA          | NA | 23/13468   |
| Irritable bowel syndrome | 48921/419376  | 2774/109563 | NA | 116/9748   |
| Ulcer                    | 6312/80102    | 822/111515  | NA | NA         |

**6. Endocrine and metabolic diseases**

|                   |               |             |            |           |
|-------------------|---------------|-------------|------------|-----------|
| Diabetes mellitus | NA            | NA          | 3234/18058 | 371/13377 |
| Gout              | 6452/127120   | 1612/110725 | NA         | NA        |
| High cholesterol  | 177886/160668 | 14678/97348 | NA         | 48/13546  |
| Hyperlipidemia    | NA            | NA          | 1142/20150 | 143/13546 |
| Hyperthyroidism   | 3638/279816   | 881/111456  | NA         | NA        |
| Hypoglycemia      | NA            | NA          | 77/21215   | 57/12400  |
| Hypothyroidism    | 17431/116070  | 5517/106820 | NA         | 232/13261 |
| Insulin user      | 1649/86695    | NA          | NA         | 26/13377  |
| Obesity           | 15297/69248   | NA          | 579/20713  | 392/12645 |
| Morbid obesity    | NA            | NA          | 579/20713  | 34/12645  |
| T2D               | 27123/525417  | 784/111522  | 1615/19677 | 159/13377 |

**7. Diseases of the eye**

|                 |               |             |           |           |
|-----------------|---------------|-------------|-----------|-----------|
| AMD             | 2569/67156    | NA          | 521/20771 | NA        |
| Astigmatism     | 110013/104519 | NA          | NA        | 98/12992  |
| Cataract        | 11500/76639   | 1820/110206 | NA        | 71/13775  |
| Farsightedness  | 49315/115664  | NA          | NA        | 71/12992  |
| Glaucoma        | 2413/114683   | 1275/111062 | NA        | 31/13593  |
| Nearsightedness | 185123/140366 | NA          | NA        | 71/12992  |
| Strabismus      | 7150/158339   | NA          | NA        | 467/12549 |

**8. Genitourinary diseases**

|                         |              |            |           |          |
|-------------------------|--------------|------------|-----------|----------|
| Chronic kidney disease  | 1341/85814   | NA         | 207/21085 | 55/13158 |
| End stage renal disease | NA           | NA         | 203/21089 | 22/13158 |
| Kidney stones           | 13486/119730 | 890/111447 | NA        | 99/13486 |
| Renal failure           | NA           | NA         | 174/21118 | 95/13158 |
| Renal failure NOS       | NA           | NA         | 60/21232  | 22/13158 |

**9. Allergies and related immune diseases**

|                                                       |              |             |            |            |
|-------------------------------------------------------|--------------|-------------|------------|------------|
| Acute upper respiratory infections                    | NA           | NA          | 1560/19732 | 2714/10032 |
| Allergic conjunctivitis                               | NA           | NA          | 70/21222   | 118/12063  |
| Allergies, other                                      | NA           | NA          | 130/21162  | 836/9247   |
| Asthma                                                | 28400/126511 | 14038/98299 | 3233/18059 | 3132/10276 |
| Atopic/contact dermatitis due to other or unspecified | NA           | NA          | 82/21210   | 1315/9301  |
| Drug allergy                                          | 9267/26571   | NA          | 41/21251   | 509/11385  |
| Eczema                                                | 31625/218433 | 3134/109203 | NA         | NA         |
| Food allergy                                          | 13947/113514 | NA          | NA         | 1227/9247  |
| Hayfever                                              | 8105/19984   | 6549/105788 | 454/20838  | 1981/8301  |
| Penicillin allergy                                    | 25559/206265 | NA          | NA         | 273/11385  |

**10. Infections**

|                      |              |             |           |           |
|----------------------|--------------|-------------|-----------|-----------|
| Bacterial meningitis | 853/82449    | 448/111889  | NA        | 25/13699  |
| Chronic hepatitis    | NA           | NA          | 92/21200  | 76/10977  |
| Hepatitis C          | 1372/211221  | NA          | NA        | 21/10977  |
| Herpes simplex       | 56979/105405 | NA          | 742/20550 | 34/10977  |
| Influenza            | NA           | NA          | 195/21097 | 45/11564  |
| Lyme disease         | 4481/147202  | NA          | NA        | 38/13101  |
| Measles              | 36593/45161  | 424/111913  | 503/20789 | NA        |
| Mononucleosis        | 17691/68127  | 125/112212  | 232/21060 | 31/10977  |
| Mumps                | 29912/51724  | 263/112074  | 944/20348 | NA        |
| Myringotomy          | 3961/81302   | NA          | 64/21228  | NA        |
| Pneumonia            | 39770/86836  | 1581/110756 | 46/21246  | 697/11642 |
| Rubella              | 11538/68374  | 148/112189  | NA        | NA        |
| Scarlet fever        | 6590/109517  | 137/112200  | NA        | NA        |
| Septicemia           | NA           | 78/112259   | NA        | 58/13054  |

|                                     |               |              |            |           |
|-------------------------------------|---------------|--------------|------------|-----------|
| Shingles                            | 16593/114894  | NA           | 590/20702  | NA        |
| Tonsillitis                         | NA            | 753/111584   | NA         | 2110/8301 |
| Tuberculosis                        | 966/164459    | 536/111801   | NA         | NA        |
| Urinary tract infection             | NA            | NA           | 530/20762  | 356/12903 |
| Viral hepatitis                     | NA            | NA           | 204/21088  | 127/10977 |
| <b>11. Musculoskeletal diseases</b> |               |              |            |           |
| Back pain                           | 15639/82392   | 19558/8920   | NA         | 71/13658  |
| Osteoarthritis                      | 28428/135127  | 10063/102274 | NA         | NA        |
| Osteoporosis                        | 12210/152336  | 1788/110238  | NA         | 36/13430  |
| Scoliosis                           | 8484/89567    | NA           | NA         | 858/12115 |
| <b>12. Neurological disorder</b>    |               |              |            |           |
| Alzheimer's disease                 | 920/221800    | NA           | 703/20589  | NA        |
| Epilepsy                            | 2624/242873   | 537/63579    | 558/20734  | 576/11787 |
| Essential tremor                    | 594/307890    | NA           | 104/21188  | NA        |
| Migraine                            | 102826/439398 | 3310/109027  | 545/20747  | 452/12345 |
| Migraine with aura                  | 10550/221352  | NA           | 249/21043  | NA        |
| Parkinson's disease                 | 11707/650723  | NA           | 478/20814  | NA        |
| Restless leg syndrome               | 7510/74539    | NA           | 43/21249   | NA        |
| <b>13. Diseases of pregnancy</b>    |               |              |            |           |
| Gestational diabetes                | 8005/148993   | NA           | 313/20979  | NA        |
| <b>14. Psychiatric diseases</b>     |               |              |            |           |
| Anxiety                             | 39812/202001  | 61430/50906  | 621/20671  | 404/10957 |
| Autism                              | 1939/498356   | NA           | NA         | 540/10790 |
| Bipolar disorder                    | 12537/504469  | NA           | 154/21138  | 54/12618  |
| Depression                          | 59179/190660  | 6900/105437  | 1328/19964 | 123/12618 |
| Eating disorder                     | 11019/452125  | NA           | NA         | 70/12618  |
| Mania                               | 3103/112412   | 2081/34001   | NA         | NA        |
| Obsessive-compulsive disorder       | 13025/483904  | NA           | NA         | 39/12618  |
| Schizophrenia                       | 965/500850    | NA           | 292/21000  | NA        |
| <b>15. Reproductive disorders</b>   |               |              |            |           |
| Endometriosis                       | 12545/76786   | 930/58081    | NA         | NA        |
| Female infertility                  | 12269/45334   | NA           | 447/20845  | NA        |
| Male infertility                    | 6464/37139    | NA           | 52/21240   | NA        |
| PCOS                                | 8053/135218   | NA           | NA         | 35/12782  |
| Uterine fibroids                    | 22410/67855   | 1687/57322   | NA         | NA        |
| <b>16. Respiratory diseases</b>     |               |              |            |           |
| Bronchiectasis                      | NA            | NA           | 531/20761  | 42/10276  |
| Bronchitis                          | NA            | NA           | 673/20619  | 48/10276  |
| Chronic bronchitis                  | 9457/75371    | NA           | 83/21209   | 23/10276  |
| Chronic sinusitis                   | NA            | 683/111654   | NA         | 366/8301  |

|                            |              |             |           |            |
|----------------------------|--------------|-------------|-----------|------------|
| COPD                       | 2312/12084   | NA          | 681/20611 | 76/10276   |
| <b>17. Sensation</b>       |              |             |           |            |
| Hearing loss               | 15515/84737  | 28414/79588 | NA        | 1693/11301 |
| Tinnitus                   | 36144/142221 | 212/112125  | NA        | NA         |
| <b>18. Skin diseases</b>   |              |             |           |            |
| Acne                       | 14812/187018 | NA          | 48/21244  | 231/13040  |
| <b>19. Sleep disorders</b> |              |             |           |            |
| Insomnia                   | 69612/184284 | NA          | NA        | 21/11795   |
| Sleep apnea                | 21109/159458 | NA          | NA        | 659/11795  |

Full list of individual phenotypic endpoints that are mapped for meta-analysis is provided in Supplementary Data file 1. NOS, not otherwise specified

**Supplementary Table 4. Replication of known GWAS associations in the PheWAS meta-analysis**

| Reported gene  | SNP        | Known associated phenotype | meta-PheWAS association results |            |                 |          |                 |           | Statistical power in meta-PheWAS# |              |              |
|----------------|------------|----------------------------|---------------------------------|------------|-----------------|----------|-----------------|-----------|-----------------------------------|--------------|--------------|
|                |            |                            | N cases                         | N controls | OR <sup>A</sup> | P value  | FDR             | Direction | alpha=0.05                        | alpha=3.8e-4 | alpha=1.8e-6 |
| <i>ATG16L1</i> | rs13391356 | Crohn's disease            | 2353                            | 259762     | 0.83            | 9.47E-10 | <b>1.25e-6</b>  | -??-      | 1                                 | 1            | 0.99         |
|                |            | IBD                        | 6062                            | 254700     | 0.93            | 5.40E-05 | <b>0.0241</b>   | -??-      | 1                                 | 1            | 1            |
| <i>CARD9</i>   | rs11145766 | Crohn's disease            | 2444                            | 261061     | 0.95            | 0.263    | 0.94            | -??-      | 0.98                              | 0.68         | 0.23         |
|                |            | IBD                        | 6158                            | 255999     | 0.95            | 0.122    | 0.857           | -??-      | 1                                 | 1            | 0.95         |
|                |            | Ulcerative colitis         | 4274                            | 259958     | 0.97            | 0.334    | 0.957           | -??+      | 0.97                              | 0.64         | 0.19         |
| <i>CARD9</i>   | rs4077515  | Crohn's disease            | 2352                            | 259728     | 1.12            | 1.90E-04 | <b>0.0579</b>   | +++       | 1                                 | 1            | 0.95         |
|                |            | IBD                        | 6061                            | 254666     | 1.09            | 8.64E-06 | <b>0.00497</b>  | +++       | 1                                 | 1            | 1            |
|                |            | Ulcerative colitis         | 4267                            | 258625     | 1.07            | 0.00407  | 0.3656          | +++       | 1                                 | 1            | 0.97         |
| <i>CD226</i>   | rs763361   | IBD                        | 13616                           | 526792     | 1.02            | 0.115    | 0.849           | +?+       | 1                                 | <b>0.98</b>  | 0.78         |
|                |            | Type 1 diabetes            | 4572                            | 655360     | 1.09            | 8.29E-05 | <b>0.0322</b>   | +++       | 1                                 | <b>0.99</b>  | 0.86         |
| <i>F11</i>     | rs4253399  | Blood clots                | 7487                            | 273305     | 1.19            | 3.50E-25 | <b>1.93e-21</b> | +++       | 1                                 | 1            | 1            |
| <i>GPR35</i>   | rs4676410  | Crohn's disease            | 2530                            | 282288     | 1.15            | 5.75E-05 | <b>0.0251</b>   | +++       | 0.79                              | 0.21         | 0.02         |
|                |            | IBD                        | 6462                            | 277008     | 1.15            | 2.05E-10 | <b>2.98e-7</b>  | +++       | 1                                 | <b>0.99</b>  | 0.88         |
|                |            | Ulcerative colitis         | 4525                            | 281021     | 1.17            | 1.50E-09 | <b>1.89e-6</b>  | +++       | 1                                 | <b>0.96</b>  | 0.7          |
| <i>GPR65</i>   | rs3742704  | Crohn's disease            | 5770                            | 517318     | 1.11            | 8.52E-04 | 0.148           | +++       | 0.99                              | <b>0.8</b>   | 0.35         |
|                |            | IBD                        | 13191                           | 505971     | 1.1             | 1.28E-05 | <b>0.00668</b>  | +++       | 1                                 | 1            | 0.97         |
|                |            | Ulcerative colitis         | 8627                            | 514874     | 1.1             | 1.91E-04 | <b>0.0579</b>   | +++       | 1                                 | <b>0.91</b>  | 0.54         |
| <i>GUCY1A3</i> | rs13139571 | CAD                        | 21918                           | 505836     | 0.94            | 6.23E-07 | <b>4.30e-4</b>  | -?-?      | 1                                 | <b>0.92</b>  | 0.58         |
|                |            | Heart attack               | 14298                           | 632007     | 0.95            | 1.78E-04 | <b>0.0551</b>   | ---       | 0.98                              | 0.68         | 0.23         |
|                |            | IBD                        | 6492                            | 275563     | 1.04            | 0.0204   | 0.63            | +++       | 0.94                              | 0.47         | 0.1          |
|                |            | Psoriasis                  | 17690                           | 385065     | 0.94            | 2.35E-07 | <b>1.84e-4</b>  | ---       | 1                                 | 1            | 1            |
|                |            | SLE                        | 1379                            | 267608     | 0.98            | 0.56     | 0.984           | -?+?      | 0.95                              | 0.52         | 0.12         |
| <i>IFIH1</i>   | rs2111485  | Type 1 diabetes            | 2785                            | 391708     | 0.89            | 6.54E-05 | <b>0.027</b>    | ---       | 1                                 | <b>0.99</b>  | 0.88         |
|                |            | Ulcerative colitis         | 4430                            | 279790     | 1.06            | 0.0231   | 0.65            | +++       | 0.97                              | 0.64         | 0.2          |
|                |            | Vitiligo                   | 51                              | 11216      | 0.93            | 0.708    | 0.994           | ???       | 0.26                              | 0.01         | <0.01        |

Diogo et al. Phenome-wide association studies across large population cohorts support drug target validation

|                |            |                      |       |        |      |          |                 |      |      |             |       |
|----------------|------------|----------------------|-------|--------|------|----------|-----------------|------|------|-------------|-------|
|                |            | PBC                  | 20    | 21272  | NA   | NA       | NA              | NA   | 0.14 | <0.01       | <0.01 |
| <i>IRF5</i>    | rs10488631 | Rheumatoid arthritis | 8031  | 381587 | 1.06 | 0.0251   | 0.657           | +++? | 1    | 1           | 0.92  |
|                |            | Sjogren's syndrome   | 89    | 21203  | 1.55 | 0.0207   | 0.634           | ??+? | 0.44 | 0.04        | <0.01 |
|                |            | SLE                  | 1336  | 246359 | 1.15 | 0.0188   | 0.61            | +??? | 1    | 1           | 1     |
|                |            | Systemic Scleroderma | 18    | 21274  | NA   | NA       | NA              | NA   | 0.12 | <0.01       | <0.01 |
| <i>IRF5</i>    | rs2004640  | PBC                  | 20    | 21272  | 1.19 | 0.59     | 0.986           | ??+? | 0.1  | <0.01       | <0.01 |
|                |            | Rheumatoid arthritis | 2702  | 130927 | 0.91 | 0.00077  | 0.142           | ?-?  | 0.96 | 0.59        | 0.16  |
|                |            | Sjogren's syndrome   | 89    | 21203  | 0.64 | 0.0035   | 0.339           | ??-? | 0.56 | 0.07        | <0.01 |
|                |            | SLE                  | 43    | 21249  | 0.71 | 0.125    | 0.857           | ??-? | 0.33 | 0.02        | <0.01 |
|                |            | Rheumatoid arthritis | 2702  | 130927 | 1.09 | 0.00335  | 0.338           | ?++? | 0.97 | 0.6         | 0.17  |
|                |            | SLE                  | 32    | 21260  | 1.24 | 0.399    | 0.967           | ??+? | 0.3  | 0.02        | <0.01 |
| <i>IRF5</i>    | rs3823536  | Ulcerative colitis   | 456   | 29480  | 1.11 | 0.132    | 0.862           | ??++ | 0.3  | 0.02        | <0.01 |
| <i>LRRK2</i>   | rs11564187 | Crohn's disease      | 1867  | 251313 | 1.15 | 0.157    | 0.886           | +??? | 0.9  | 0.38        | 0.06  |
|                |            | IBD                  | 5495  | 246251 | 1.14 | 0.0287   | 0.668           | +??? | 1    | <b>0.89</b> | 0.51  |
| <i>LRRK2</i>   | rs1491942  | Crohn's disease      | 1867  | 251313 | 1.12 | 0.00949  | 0.514           | +??? | 0.83 | 0.26        | 0.03  |
|                |            | IBD                  | 5834  | 267204 | 1.02 | 0.367    | 0.962           | +?+? | 0.99 | 0.77        | 0.32  |
|                |            | Parkinson's disease  | 9786  | 324827 | 1.1  | 1.51E-07 | <b>1.39e-4</b>  | +?-? | 1    | 1           | 1     |
|                |            | Ulcerative colitis   | 4326  | 271245 | 0.99 | 0.77     | 0.998           | -?+? | 0.87 | 0.32        | 0.05  |
| <i>SLC30A8</i> | rs13266634 | Type 2 diabetes      | 48015 | 556969 | 0.91 | 5.04E-35 | <b>4.64e-31</b> | --?  | 1    | 1           | 1     |
| <i>TMEM175</i> | rs34311866 | Parkinson's disease  | 9308  | 297840 | 1.2  | 8.04E-21 | <b>2.77e-17</b> | +??? | 1    | 1           | 1     |
| <i>TMEM175</i> | rs34884217 | Parkinson's disease  | 2162  | 323427 | 0.81 | 8.10E-05 | <b>0.0322</b>   | -??? | 1    | <b>0.97</b> | 0.72  |
| <i>TYK2</i>    | rs12720356 | Crohn's disease      | 2353  | 259763 | 1.13 | 0.0175   | 0.599           | +??+ | 0.84 | 0.27        | 0.03  |
|                |            | IBD                  | 6062  | 254701 | 1.11 | 7.73E-04 | 0.142           | +??+ | 1    | <b>0.91</b> | 0.54  |
|                |            | Psoriasis            | 17386 | 364096 | 0.93 | 1.27E-04 | <b>0.0445</b>   | --?  | 1    | 1           | 1     |
|                |            | SLE                  | 1336  | 246359 | 1.1  | 0.196    | 0.91            | +??? | 1    | <b>0.91</b> | 0.55  |
|                |            | Ulcerative colitis   | 4268  | 258660 | 1.11 | 0.0066   | 0.446           | +??+ | 0.99 | 0.75        | 0.29  |
| <i>TYK2</i>    | rs34536443 | Crohn's disease      | 2333  | 259290 | 0.77 | 0.00317  | 0.329           | -??- | 0.92 | 0.42        | 0.08  |
|                |            | IBD                  | 6038  | 254228 | 0.92 | 0.076    | 0.811           | -??- | 0.97 | 0.63        | 0.19  |
|                |            | Multiple sclerosis   | 1399  | 249152 | 0.88 | 0.19     | 0.907           | -??? | 0.61 | 0.1         | <0.01 |
|                |            | Psoriasis            | 17382 | 363480 | 0.78 | 2.58E-16 | <b>5.47e-13</b> | --?  | 1    | 1           | 1     |

|                      |      |        |      |          |                |      |      |             |     |
|----------------------|------|--------|------|----------|----------------|------|------|-------------|-----|
| Rheumatoid arthritis | 7896 | 360430 | 0.8  | 1.25E-07 | <b>1.19e-4</b> | --?? | 1    | <b>1</b>    | 1   |
| SLE                  | 1336 | 246359 | 0.65 | 1.25E-04 | <b>0.0442</b>  | -??? | 1    | <b>0.99</b> | 0.9 |
| Type 1 diabetes      | 1912 | 370633 | 0.89 | 0.203    | 0.914          | --?- | 0.99 | 0.76        | 0.3 |

<sup>^</sup> Effect of minor allele. Refer to Supplementary Data file 1 for detailed information.

<sup>§</sup> Direction of effect in 23andMe, Genomics plc UK Biobank, FINRISK, and CHOP, respectively.

<sup>#</sup> Statistical power to detect an association in the meta-PheWAS was calculated based on the effect allele frequency in the 1000Genomes European population, the published effect size in GWAS, the number of cases and controls in the meta-PheWAS and the corresponding disease prevalence reported by the Centers for Disease Control and Prevention (see Methods). Three significance cutoffs were tested:  $P < 0.05$ ,  $FDR < 0.1$  ( $P < 3.8e-4$ ), and Bonferroni-corrected significance ( $P < 1.8e-6$ ).

CAD, coronary artery disease; IBD, inflammatory bowel disease; SLE, systemic lupus erythematosus; PBC, primary biliary cirrhosis.

**Supplementary Table 5. Putative novel associations identified in the meta-PheWAS**

| Reported Gene                                | SNP        | Phenotype*                     | OR <sup>^</sup> | (CI95)             | P value         | N cohorts | N cases       | N controls    | FDR             | Direction <sup>s</sup> | P            |
|----------------------------------------------|------------|--------------------------------|-----------------|--------------------|-----------------|-----------|---------------|---------------|-----------------|------------------------|--------------|
| <b>A. Known autoimmunity-associated SNPs</b> |            |                                |                 |                    |                 |           |               |               |                 |                        |              |
| <i>CARD9</i>                                 | rs4077515  | Heart attack                   | 0.94            | (0.91-0.97)        | 0.00023         | 2         | 8285          | 355845        | 0.0453          | --???                  | 3.75         |
|                                              |            | Ibuprofen AE: bleeding         | 1.37            | (1.16-1.64)        | 4.51E-04        | 1         | 248           | 48697         | 0.0759          | +????                  | NA           |
|                                              |            | T2D                            | 0.96            | (0.94-0.98)        | 7.62E-05        | 4         | 51194         | 500981        | 0.0194          | --??                   | 0            |
| <i>CD226</i>                                 | rs763361   | Blood sugar medication         | 1.04            | (1.02-1.07)        | 3.00E-04        | 1         | 17026         | 230655        | 0.0556          | +????                  | NA           |
|                                              |            | Cluster headaches              | 1.05            | (0.97-1)           | 5.74E-04        | 1         | 11070         | 217298        | 0.088           | +????                  | NA           |
|                                              |            | Dust mite allergy (1)          | 1.03            | (1.01-1.04)        | 4.58E-04        | 1         | 43035         | 206272        | 0.0762          | +????                  | NA           |
|                                              |            | Dust mites allergy (clean) (1) | 1.03            | (1.01-1.05)        | 3.75E-04        | 1         | 42716         | 114860        | 0.0677          | +????                  | NA           |
|                                              |            | Dust mites allergy (meta) (1)  | 1.03            | (1.01-1.05)        | 3.96E-04        | 1         | 42716         | 123896        | 0.0695          | +????                  | NA           |
|                                              |            | <b>Hypothyroidism</b>          | <b>1.05</b>     | <b>(1.04-1.08)</b> | <b>8.11E-11</b> | <b>3</b>  | <b>35428</b>  | <b>412577</b> | <b>5.49E-08</b> | <b>++?+?</b>           | <b>0</b>     |
|                                              |            | Lobular carcinoma in situ      | 0.72            | (0.6-0.86)         | 3.91E-04        | 1         | 246           | 11855         | 0.0692          | -????                  | NA           |
|                                              |            | Multiple sclerosis             | 1.07            | (1.03-1.12)        | 3.78E-04        | 3         | 8113          | 539081        | 0.0678          | ++?+                   | 0            |
| <i>TYK2</i>                                  | rs12720356 | Viral hepatitis                | 1.38            | (1.18-1.61)        | 6.08E-05        | 2         | 323           | 30516         | 0.0164          | ??+?                   | 39.93        |
|                                              |            | Acne                           | 1.08            | (1.03-1.12)        | 4.21E-04        | 2         | 15020         | 198330        | 0.0718          | ++?-?                  | 0            |
|                                              |            | Gallstones                     | 1.08            | (1.04-1.13)        | 0.0005          | 1         | 13300         | 120654        | 0.0804          | +????                  | NA           |
|                                              |            | T2D                            | 1.07            | (1.03-1.12)        | 4.10E-04        | 3         | 16354         | 386040        | 0.07078         | ++?+                   | 0            |
| <i>TYK2</i>                                  | rs34536443 | Tonsillectomy                  | 1.06            | (1.03-1.09)        | 5.06E-05        | 1         | 58942         | 109420        | 0.014           | +????                  | NA           |
|                                              |            | Anorexia                       | 6.36            | (2.4-16.81)        | 2.03E-04        | 1         | 21            | 9045          | 0.0409          | ??+?                   | NA           |
|                                              |            | <b>Any immune disease</b>      | <b>0.91</b>     | <b>(0.88-0.93)</b> | <b>4.27E-12</b> | <b>1</b>  | <b>112148</b> | <b>173986</b> | <b>3.48E-09</b> | <b>-????</b>           | <b>NA</b>    |
|                                              |            | <b>Hypothyroidism</b>          | <b>0.88</b>     | <b>(0.83-0.93)</b> | <b>1.19E-06</b> | <b>3</b>  | <b>23145</b>  | <b>233757</b> | <b>0.00045</b>  | <b>--?+?</b>           | <b>55.86</b> |
|                                              |            | Hypoventilation                | 3.65            | (1.76-7.56)        | 4.86E-04        | 1         | 55            | 10130         | 0.0789          | ??+?                   | NA           |
| <i>GPR35</i>                                 | rs4676410  | Pituitary hypofunction         | 2.56            | (1.49-4.35)        | 5.95E-04        | 1         | 163           | 10437         | 0.09            | ??+?                   | NA           |
|                                              |            | Tonsillectomy                  | 1.09            | (1.04-1.12)        | 8.28E-05        | 1         | 58942         | 109420        | 0.0205          | +????                  | NA           |
|                                              |            | Any allergy (2)                | 0.97            | (0.95-0.98)        | 6.16E-05        | 1         | 66627         | 106999        | 0.0164          | -????                  | NA           |
|                                              |            | Chemotherapy                   | 1.08            | (1.04-1.12)        | 1.47E-04        | 2         | 8339          | 266624        | 0.0324          | ++?+                   | 0            |
|                                              |            | Essential hypertension         | 0.9             | (0.85-0.95)        | 4.19E-04        | 2         | 4193          | 30694         | 0.0718          | ??--?                  | 74.25        |
|                                              |            | No allergies (2)               | 1.03            | (1.02-1.04)        | 5.58E-04        | 1         | 115400        | 124518        | 0.088           | +????                  | NA           |
|                                              |            | Pollen allergy (2)             | 0.96            | (0.94-0.98)        | 6.11E-04        | 1         | 39115         | 110451        | 0.0917          | -????                  | NA           |
|                                              |            | Rhinitis (2)                   | 0.96            | (0.94-0.98)        | 1.23E-05        | 1         | 53635         | 117562        | 0.00388         | -????                  | NA           |
|                                              |            | Seasonal allergies (broad) (2) | 0.96            | (0.95-0.98)        | 1.52E-04        | 1         | 50993         | 109231        | 0.0327          | -????                  | NA           |
|                                              |            | Weeds allergy (2)              | 0.96            | (0.94-0.98)        | 5.73E-04        | 1         | 28025         | 111931        | 0.088           | -????                  | NA           |
| <i>GPR65</i>                                 | rs3742704  | Asthma                         | 1.04            | (1.02-1.06)        | 4.58E-05        | 4         | 90712         | 455177        | 0.013           | +?++                   | 54.04        |
|                                              |            | Eczema                         | 1.04            | (1.03-1.06)        | 9.80E-05        | 2         | 62003         | 558968        | 0.0231          | +???                   | 0            |
|                                              |            | Obstructive sleep apnea        | 1.47            | (1.17-1.82)        | 6.83E-04        | 1         | 404           | 10143         | 0.0993          | ??+?                   | NA           |
| <i>GUCY1A3</i>                               | rs13139571 | Speech and language disorder   | 1.51            | (1.23-1.85)        | 6.82E-05        | 1         | 480           | 9421          | 0.0179          | ??+?                   | NA           |
|                                              |            | Death: Diabetes (type II or I) | 0.65            | (0.51-0.83)        | 2.55E-04        | 1         | 248           | 21044         | 0.0491          | ??-??                  | NA           |
| <i>IFIH1</i>                                 | rs1990760  | High cholesterol medication    | 0.98            | (1.03-1.08)        | 5.74E-04        | 1         | 118184        | 407440        | 0.088           | -????                  | NA           |
|                                              |            | AMD                            | 1.1             | (1.04-1.15)        | 6.53E-04        | 2         | 3090          | 87927         | 0.0964          | ++?+                   | 74.87        |
|                                              |            | <b>Asthma</b>                  | <b>1.04</b>     | <b>(1.02-1.05)</b> | <b>1.11E-07</b> | <b>5</b>  | <b>57182</b>  | <b>269499</b> | <b>5.24E-05</b> | <b>+++++</b>           | <b>0</b>     |
|                                              |            | CAD                            | 0.96            | (0.94-0.98)        | 5.16E-04        | 3         | 35199         | 320665        | 0.0829          | -?+?                   | 32.97        |
|                                              |            | Ever pregnant                  | 0.97            | (0.94-0.98)        | 3.10E-05        | 1         | 87019         | 46269         | 0.00937         | -????                  | NA           |



|                                                        |            |                                          |             |                    |                 |          |               |               |                 |              |       |
|--------------------------------------------------------|------------|------------------------------------------|-------------|--------------------|-----------------|----------|---------------|---------------|-----------------|--------------|-------|
|                                                        |            | Hypothyroidism                           | 0.96        | (0.94-0.98)        | 1.64E-04        | 3        | 23155         | 234399        | 0.0342          | --??         | 0     |
|                                                        |            | Took blood thinners                      | 0.96        | (0.94-0.98)        | 3.20E-04        | 1        | 22985         | 236431        | 0.0588          | -????        | NA    |
|                                                        |            | Wheat allergy (3)                        | 1.11        | (1.05-1.17)        | 2.19E-04        | 1        | 2720          | 115036        | 0.0434          | +????        | NA    |
|                                                        |            | Wheat allergy (clean) (3)                | 1.1         | (1.04-1.16)        | 6.93E-04        | 1        | 2684          | 80097         | 0.0999          | +????        | NA    |
| <i>IRF5</i>                                            | rs10488631 | Acid-base balance disorder               | 2.2         | (1.41-3.46)        | 5.80E-04        | 1        | 55            | 12801         | 0.0885          | ??+?         | NA    |
|                                                        |            | <b>Hypothyroidism</b>                    | <b>1.08</b> | <b>(1.05-1.12)</b> | <b>5.78E-07</b> | <b>3</b> | <b>23182</b>  | <b>236240</b> | <b>2.36E-04</b> | <b>++?+?</b> | 8.01  |
|                                                        |            | Systolic/diastolic heart failure         | 3.69        | (2.04-6.69)        | 1.57E-05        | 1        | 25            | 13191         | 0.00483         | ??+?         | NA    |
| <i>IRF5</i>                                            | rs2004640  | Psoriasis                                | 0.9         | (0.85-0.95)        | 6.59E-05        | 4        | 3737          | 144879        | 0.0174          | ?----        | 0     |
| <i>IRF5</i>                                            | rs3823536  | Psoriasis                                | 1.11        | (1.06-1.18)        | 8.92E-05        | 4        | 3690          | 145494        | 0.0217          | ?+++         | 0     |
| <b>B. Known cardiovascular disease-associated SNPs</b> |            |                                          |             |                    |                 |          |               |               |                 |              |       |
| <i>F11</i>                                             | rs4253399  | Pulmonary embolism                       | 1.17        | (1.07-1.28)        | 6.80E-04        | 1        | 949           | 111077        | 0.0993          | ?+???        | NA    |
| <i>GDF15</i>                                           | rs17724992 | Acid reflux (4)                          | 0.97        | (0.96-0.99)        | 1.56E-04        | 2        | 67776         | 299571        | 0.0333          | -???         | 0     |
|                                                        |            | ADHD                                     | 0.98        | (0.95-0.99)        | 5.61E-04        | 1        | 38253         | 463544        | 0.088           | -???         | NA    |
|                                                        |            | Ankylosing spondylitis                   | 0.86        | (0.8-0.93)         | 6.92E-05        | 2        | 2814          | 113626        | 0.0179          | ?-?-         | 0     |
|                                                        |            | <b>Blood pressure medication (5)</b>     | <b>0.97</b> | <b>(0.96-0.98)</b> | <b>1.76E-07</b> | <b>1</b> | <b>125406</b> | <b>394753</b> | <b>7.63E-05</b> | <b>-????</b> | NA    |
|                                                        |            | CAD                                      | 0.96        | (0.94-0.98)        | 1.40E-05        | 2        | 40900         | 554363        | 0.00437         | -???         | 0     |
|                                                        |            | Crohn's disease                          | 0.93        | (0.9-0.96)         | 4.12E-05        | 2        | 11229         | 522948        | 0.0119          | -???         | 0     |
|                                                        |            | <b>CVD (5)</b>                           | <b>0.97</b> | <b>(0.96-0.98)</b> | <b>1.40E-06</b> | <b>1</b> | <b>148577</b> | <b>388405</b> | <b>5.11E-04</b> | <b>-????</b> | NA    |
|                                                        |            | <b>GERD (4)</b>                          | <b>0.97</b> | <b>(0.96-0.98)</b> | <b>6.11E-07</b> | <b>1</b> | <b>130654</b> | <b>384572</b> | <b>2.46E-04</b> | <b>-????</b> | NA    |
|                                                        |            | Healthy old                              | 1.05        | (1.03-1.07)        | 1.23E-05        | 1        | 25481         | 314694        | 0.00388         | +????        | NA    |
|                                                        |            | Heart attack                             | 0.95        | (0.92-0.98)        | 5.71E-04        | 2        | 12948         | 613899        | 0.088           | -???         | 0.51  |
|                                                        |            | <b>Heart metabolic disease (5)</b>       | <b>0.97</b> | <b>(0.97-0.98)</b> | <b>3.08E-09</b> | <b>1</b> | <b>275944</b> | <b>209302</b> | <b>1.86E-06</b> | <b>-????</b> | NA    |
|                                                        |            | Hemorrhoids                              | 0.98        | (0.95-0.99)        | 5.50E-04        | 1        | 60280         | 104280        | 0.0872          | -????        | NA    |
|                                                        |            | <b>High blood pressure (5)</b>           | <b>0.97</b> | <b>(0.97-0.98)</b> | <b>7.64E-09</b> | <b>2</b> | <b>151511</b> | <b>465686</b> | <b>4.42E-06</b> | <b>-???</b>  | 80.26 |
|                                                        |            | Insomnia (6)                             | 0.98        | (0.97-0.99)        | 1.22E-05        | 1        | 140208        | 376764        | 0.00388         | -???         | NA    |
|                                                        |            | Low HDL                                  | 0.97        | (0.95-0.99)        | 6.16E-04        | 1        | 47006         | 172343        | 0.0919          | -????        | NA    |
|                                                        |            | Psoriasis                                | 0.97        | (0.95-0.98)        | 2.59E-04        | 2        | 29205         | 600126        | 0.0493          | -???         | 0     |
|                                                        |            | Sleep medication (6)                     | 0.99        | (0.97-0.99)        | 4.51E-04        | 1        | 109844        | 365576        | 0.0759          | -????        | NA    |
| <i>KNG1</i>                                            | rs5030062  | Bleeding tendency                        | 0.88        | (0.81-0.94)        | 4.05E-04        | 1        | 1574          | 85223         | 0.07            | -????        | NA    |
|                                                        |            | Blood clots                              | 1.07        | (1.03-1.1)         | 1.57E-04        | 3        | 7495          | 275151        | 0.0333          | +?+?         | 59.82 |
| <i>LGALS3</i>                                          | rs2274273  | CAD                                      | 1.05        | (1.02-1.07)        | 1.48E-04        | 1        | 17875         | 469980        | 0.0324          | +????        | NA    |
|                                                        |            | Ever pregnant                            | 1.03        | (1.01-1.05)        | 4.55E-04        | 1        | 170448        | 76051         | 0.076           | +????        | NA    |
|                                                        |            | Excess hair                              | 1.04        | (1.02-1.06)        | 2.71E-04        | 1        | 28355         | 95842         | 0.0505          | +????        | NA    |
|                                                        |            | High plasma glucose                      | 1.02        | (1.01-1.04)        | 6.70E-04        | 1        | 50820         | 415290        | 0.0984          | +????        | NA    |
|                                                        |            | Parkinson's disease (7)                  | 0.94        | (0.92-0.97)        | 1.01E-04        | 1        | 8615          | 608014        | 0.0235          | -????        | NA    |
|                                                        |            | Parkinson's disease (all population) (7) | 0.94        | (0.92-0.97)        | 1.09E-04        | 1        | 8615          | 623197        | 0.0249          | -????        | NA    |
| <i>PNPLA3</i>                                          | rs738409   | Aspirin AE: liver                        | 1.57        | (1.27-1.93)        | 5.26E-05        | 1        | 204           | 47611         | 0.0145          | +????        | NA    |
|                                                        |            | Gallstones (8)                           | 0.95        | (0.93-0.98)        | 2.70E-04        | 2        | 18208         | 258768        | 0.0505          | --????       | 0     |
|                                                        |            | Gallstones (broad definition) (8)        | 0.95        | (0.92-0.98)        | 4.72E-04        | 1        | 13300         | 120654        | 0.077           | -????        | NA    |
|                                                        |            | Gout                                     | 0.93        | (0.88-0.96)        | 4.05E-05        | 2        | 8064          | 237845        | 0.0118          | --???        | 67.96 |
|                                                        |            | <b>High cholesterol (9)</b>              | <b>0.96</b> | <b>(0.94-0.97)</b> | <b>1.59E-07</b> | <b>2</b> | <b>101646</b> | <b>180947</b> | <b>7.11E-05</b> | <b>--???</b> | 0     |
|                                                        |            | High cholesterol medication (9)          | 0.97        | (0.95-0.98)        | 1.96E-04        | 1        | 66819         | 193997        | 0.0398          | -????        | NA    |
|                                                        |            | Ibuprofen AE: liver                      | 1.43        | (1.21-1.69)        | 4.57E-05        | 1        | 336           | 48609         | 0.013           | +????        | NA    |
|                                                        |            | <b>Severe acne</b>                       | <b>0.9</b>  | <b>(0.88-0.93)</b> | <b>1.47E-11</b> | <b>1</b> | <b>14812</b>  | <b>187018</b> | <b>1.14E-08</b> | <b>-????</b> | NA    |
| <i>SLC30A8</i>                                         | rs13266634 | High cholesterol medication              | 0.98        | (0.97-1)           | 3.42E-04        | 1        | 118624        | 409363        | 0.0626          | -????        | NA    |

|                                                           |            |                         |      |             |          |   |       |       |        |       |    |
|-----------------------------------------------------------|------------|-------------------------|------|-------------|----------|---|-------|-------|--------|-------|----|
|                                                           |            | Tachycardia             | 1.75 | (1.29-2.36) | 2.66E-04 | 1 | 89    | 12759 | 0.0502 | ??#+? | NA |
| <b>C. Known immune disease-associated SNPs</b>            |            |                         |      |             |          |   |       |       |        |       |    |
| <i>CDHR3</i>                                              | rs6967330  | Psoriatic arthropathy   | 2.5  | (1.53-4.09) | 2.59E-04 | 1 | 37    | 11000 | 0.0493 | ??#+? | NA |
| <b>D. Known neurodegenerative disease-associated SNPs</b> |            |                         |      |             |          |   |       |       |        |       |    |
| <i>TMEM175</i>                                            | rs34311866 | Heart metabolic disease | 1.1  | (1.04-1.15) | 6.95E-04 | 1 | 37694 | 6586  | 0.0999 | +???? | NA |

\*Putative novel associations reaching FDR<0.1 are shown. Associations reaching Bonferroni-corrected significance ( $P < 1.8e-6$ ) are highlighted in bold. Full meta-PheWAS results are provided in Supplementary file 1.

^ Effect of minor allele. Refer to Supplementary Data file 1 for detailed information.

§ Direction of effect in 23andMe, Genomics plc UK Biobank, FINRISK, CHOP and GWAS, respectively.

Numbers in parentheses after the Phenotype name identify related/non-independent phenotypic endpoints

**Supplementary Table 6. Replication of potential novel associations in the latest release of UK Biobank**

| Gene                                                                                               | SNP        | Phenotype*                      | MAF   | PheWAS meta-analysis |       |                  |          | UK Biobank v2       |                        |                    |     | META-ANALYSIS <sup>s</sup> |       |          |
|----------------------------------------------------------------------------------------------------|------------|---------------------------------|-------|----------------------|-------|------------------|----------|---------------------|------------------------|--------------------|-----|----------------------------|-------|----------|
|                                                                                                    |            |                                 |       | N                    | Dir#  | OR (CI95)        | P value  | UK Biobank field ID | N cases/<br>N controls | Power <sup>a</sup> | Dir | P value                    | Z     | P value  |
| <b>A. Strengthened association in meta-analysis with UK Biobank v2; P&lt;0.05 in UK Biobank v2</b> |            |                                 |       |                      |       |                  |          |                     |                        |                    |     |                            |       |          |
| <i>CD226</i>                                                                                       | rs763361   | Hypothyroidism                  | 0.475 | 3                    | +++?  | 1.05 (1.04-1.08) | 8.11e-11 | 20002_1226          | 16376/320783           | 0.991              | +   | 4.71E-09                   | 7.85  | 2.11e-15 |
| <i>F11</i>                                                                                         | rs4253399  | Pulmonary embolism              | 0.39  | 1                    | ?+??? | 1.17 (1.07-1.28) | 0.00068  | 20002_1093          | 2801/334358            | 0.999              | +   | 5.42E-13                   | 7.12  | 5.42e-13 |
| <i>GDF15</i>                                                                                       | rs17724992 | High blood pressure (1)         | 0.266 | 2                    | --??? | 0.97 (0.97-0.98) | 7.64e-9  | 6150_4              | 91033/245650           | 0.999              | -   | 4.41E-05                   | -7.17 | 3.85e-13 |
|                                                                                                    |            | Blood pressure medication (1)   | 0.266 | 1                    | -???? | 0.97 (0.96-0.98) | 1.76e-7  | 6177_2              | 38548/116154           | 0.904              | -   | 4.70E-05                   | -6.35 | 1.10e-10 |
|                                                                                                    |            | Acid reflux                     | 0.266 | 2                    | --??? | 0.97 (0.96-0.99) | 0.000156 | 20002_1138          | 14316/322843           | 0.614              | -   | 0.011                      | -4.11 | 1.98e-5  |
|                                                                                                    |            | Heart attack                    | 0.266 | 2                    | --??? | 0.95 (0.92-0.98) | 0.000571 | 20002_1075          | 7735/329424            | 0.803              | -   | 0.00338                    | -3.56 | 0.00018  |
| <i>GPR65</i>                                                                                       | rs3742704  | Asthma                          | 0.086 | 4                    | +?++  | 1.04 (1.02-1.06) | 4.58e-5  | 22127               | 10589/72940            | 0.328              | +   | 0.0175                     | 4.7   | 1.29e-6  |
|                                                                                                    |            | Eczema                          | 0.086 | 2                    | +???  | 1.04 (1.03-1.06) | 9.80e-5  | 20002_1452          | 8718/328441            | 0.305              | +   | 0.0259                     | 4.28  | 9.24e-6  |
| <i>GUCY1A3</i>                                                                                     | rs13139571 | High cholesterol medication     | 0.245 | 1                    | -???? | 0.98 (1.03-1.08) | 0.000574 | 6177_1              | 35840/118862           | 0.539              | -   | 5.47E-05                   | -4.71 | 1.23e-6  |
| <i>IFIH1</i>                                                                                       | rs2111485  | Hypothyroidism                  | 0.41  | 3                    | --?-? | 0.96 (0.94-0.98) | 0.000164 | 20002_1226          | 16376/320783           | 0.947              | -   | 3.45E-12                   | -6.76 | 6.74e-12 |
|                                                                                                    |            | Asthma                          | 0.41  | 5                    | ++++  | 1.04 (1.02-1.05) | 1.11e-7  | 20002_1111          | 39049/298110           | 0.999              | +   | 2.55E-05                   | 5.49  | 2.01e-08 |
| <i>IRF5</i>                                                                                        | rs10488631 | Hypothyroidism                  | 0.11  | 3                    | +++?+ | 1.08 (1.05-1.12) | 5.78e-7  | 20002_1226          | 16376/320783           | 0.99               | +   | 0.00091                    | 5.06  | 2.11e-7  |
| <i>PNPLA3</i>                                                                                      | rs738409   | Gallstones                      | 0.228 | 2                    | --??? | 0.95 (0.92-0.98) | 0.00027  | 20002_1162          | 5573/331586            | 0.624              | -   | 0.00966                    | -4.17 | 1.51e-5  |
|                                                                                                    |            | Gout                            | 0.228 | 2                    | --??? | 0.93 (0.88-0.96) | 4.05e-5  | 20002_1466          | 4807/332352            | 0.849              | -   | 6.17E-09                   | -5.77 | 3.87e-9  |
|                                                                                                    |            | High cholesterol (2)            | 0.228 | 2                    | --??? | 0.96 (0.94-0.97) | 1.59e-7  | 20002_1473          | 41296/295863           | 0.996              | -   | 9.35E-05                   | -5.6  | 1.06e-8  |
|                                                                                                    |            | High cholesterol medication (2) | 0.228 | 1                    | -???? | 0.97 (0.95-0.98) | 0.000196 | 6177_1              | 35840/118862           | 0.856              | -   | 0.0232                     | -4.03 | 2.75e-5  |
| <i>TYK2</i>                                                                                        | rs34536443 | Hypothyroidism                  | 0.041 | 3                    | --?+? | 0.88 (0.83-0.93) | 1.19e-6  | 20002_1226          | 16376/320783           | 0.995              | -   | 6.69E-11                   | -6.6  | 2.10e-11 |
| <b>B. Strengthened association in meta-analysis with UK Biobank v2; P&gt;0.05 in UK Biobank v2</b> |            |                                 |       |                      |       |                  |          |                     |                        |                    |     |                            |       |          |
| <i>CD226</i>                                                                                       | rs763361   | Dust mites allergy              | 0.475 | 1                    | +???? | 1.03 (1.01-1.04) | 0.000458 | 20002_1668          | 183/336976             | 0.059              | +   | 0.552                      | 3.35  | 0.0004   |
| <i>GDF15</i>                                                                                       | rs17724992 | Insomnia                        | 0.266 | 1                    | -???? | 0.98 (0.97-0.99) | 1.22e-5  | 20002_1616          | 321/336838             | 0.056              | -   | 0.798                      | -4.26 | 1.02e-5  |
|                                                                                                    |            | Psoriasis                       | 0.266 | 2                    | --??? | 0.97 (0.95-0.98) | 0.000259 | 20002_1453          | 3871/333288            | 0.221              | -   | 0.088                      | -3.51 | 0.00022  |
| <i>GPR35</i>                                                                                       | rs4676410  | Pollen allergy                  | 0.2   | 1                    | -???? | 0.96 (0.94-0.98) | 0.000611 | 22126               | 18934/64595            | 0.803              | -   | 0.102                      | -3.37 | 0.00037  |
| <i>PNPLA3</i>                                                                                      | rs738409   | Acne                            | 0.228 | 1                    | -???? | 0.9 (0.88-0.93)  | 1.47e-11 | 20002_1548          | 189/336970             | 0.14               | -   | 0.899                      | -6.75 | 7.25e-12 |
| <i>SLC30A8</i>                                                                                     | rs13266634 | High cholesterol medication     | 0.3   | 1                    | -???? | 0.98 (0.97-1)    | 0.000342 | 6153_1              | 22705/157498           | 0.461              | -   | 0.104                      | -3.61 | 0.00015  |
| <i>TYK2</i>                                                                                        | rs12720356 | T2D                             | 0.088 | 3                    | +++?+ | 1.07 (1.03-1.12) | 0.00041  | 20002_1223          | 2133/335026            | 0.243              | +   | 0.0539                     | 3.6   | 0.00016  |
| <i>TYK2</i>                                                                                        | rs34536443 | Pituitary hypofunction          | 0.041 | 1                    | ??+?  | 2.56 (1.49-4.35) | 0.000595 | 20002_1430          | 118/337041             | 0.851              | +   | 0.105                      | 3.28  | 0.00053  |
| <b>C. Lack of replication in UK Biobank v2</b>                                                     |            |                                 |       |                      |       |                  |          |                     |                        |                    |     |                            |       |          |
| <i>CARD9</i>                                                                                       | rs4077515  | T2D                             | 0.42  | 4                    | --?-- | 0.96 (0.94-0.98) | 7.62e-5  | 20002_1223          | 2133/335026            | 0.263              | -   | 0.562                      | -3.53 | 0.0002   |
|                                                                                                    |            | Heart attack                    | 0.42  | 2                    | --??? | 0.94 (0.91-0.97) | 0.00023  | 20002_1075          | 7735/329424            | 0.967              | -   | 0.0108                     | -3.12 | 0.0009   |
| <i>CD226</i>                                                                                       | rs763361   | Viral hepatitis                 | 0.475 | 2                    | ??+?  | 1.38 (1.18-1.61) | 6.08e-5  | 20002_1156          | 680/336479             | 0.999              | -   | 0.266                      | 1.58  | 0.0566   |

|                |            |                                  |       |   |        |                  |          |            |             |       |   |         |       |         |
|----------------|------------|----------------------------------|-------|---|--------|------------------|----------|------------|-------------|-------|---|---------|-------|---------|
|                |            | Multiple sclerosis               | 0.475 | 3 | +?+?+  | 1.07 (1.03-1.12) | 0.000378 | 20002_1261 | 1228/335931 | 0.393 | + | 0.315   | 1.31  | 0.0947  |
| <i>CDHR3</i>   | rs6967330  | Psoriatic arthropathy            | 0.2   | 1 | ????+? | 2.5 (1.53-4.09)  | 0.000259 | 20002_1477 | 650/336509  | 1     | - | 0.847   | -0.19 | 0.424   |
| <i>GDF15</i>   | rs17724992 | Ankylosing spondylitis           | 0.266 | 2 | ?-??-  | 0.86 (0.8-0.93)  | 6.92e-5  | 20002_1313 | 968/336191  | 0.841 | + | 0.27    | -1.67 | 0.047   |
|                |            | Crohn's disease                  | 0.266 | 2 | -????- | 0.93 (0.9-0.96)  | 4.12e-5  | 20002_1462 | 1032/336127 | 0.312 | - | 0.198   | -0.68 | 0.246   |
|                |            | CVD (1)                          | 0.266 | 1 | -????  | 0.97 (0.96-0.98) | 1.40e-6  | 20002_1066 | 1096/336063 | 0.097 | + | 0.0387  | -4.48 | 3.66e-6 |
| <i>GPR35</i>   | rs4676410  | Essential hypertension           | 0.2   | 2 | ??-?   | 0.9 (0.85-0.95)  | 0.000419 | 20002_1072 | 1537/335622 | 0.654 | + | 0.176   | -2.26 | 0.01187 |
| <i>GPR65</i>   | rs3742704  | Obstructive sleep apnea          | 0.086 | 1 | ????+? | 1.47 (1.17-1.82) | 0.000683 | 20002_1123 | 1064/336095 | 0.999 | - | 0.837   | 0.82  | 0.207   |
| <i>IFIH1</i>   | rs2111485  | AMD                              | 0.41  | 2 | +?+??  | 1.1 (1.04-1.15)  | 0.000653 | 20002_1528 | 189/336970  | 0.151 | - | 0.59    | 2.9   | 0.00185 |
| <i>IRF5</i>    | rs10488631 | Systolic/diastolic heart failure | 0.11  | 1 | ????+? | 3.69 (2.04-6.69) | 1.57e-5  | 20002_1076 | 216/336943  | 0.999 | - | 0.424   | 1.55  | 0.0603  |
| <i>IRF5</i>    | rs2004640  | Psoriasis                        | 0.47  | 4 | ?----  | 0.9 (0.85-0.95)  | 6.59e-5  | 20002_1453 | 3871/333288 | 0.996 | - | 0.00732 | -2.57 | 0.00495 |
| <i>IRF5</i>    | rs3823536  | Psoriasis                        | 0.47  | 4 | ?++++  | 1.11 (1.06-1.18) | 8.92e-5  | 20002_1453 | 3871/333288 | 0.996 | + | 0.00326 | 2.44  | 0.00735 |
| <i>KNG1</i>    | rs5030062  | Blood clots                      | 0.384 | 3 | +?+??  | 1.07 (1.03-1.1)  | 0.000157 | 20002_1068 | 66/337093   | 0.067 | - | 0.488   | 3.48  | 0.00025 |
|                |            | Bleeding tendency                | 0.384 | 1 | -????  | 0.88 (0.81-0.94) | 0.000405 | 20002_1445 | 320/336839  | 0.355 | + | 0.983   | -2.17 | 0.0149  |
| <i>LGALS3</i>  | rs2274273  | Parkinson's disease              | 0.4   | 1 | -????  | 0.94 (0.92-0.97) | 0.000101 | 20002_1262 | 604/336555  | 0.186 | - | 0.382   | -3.66 | 0.00012 |
| <i>SLC30A8</i> | rs13266634 | Tachycardia                      | 0.3   | 1 | ????+? | 1.75 (1.29-2.36) | 0.000266 | 20002_1487 | 168/336991  | 0.998 | + | 0.912   | 3.13  | 0.00088 |
| <i>TYK2</i>    | rs12720356 | Gallstones                       | 0.088 | 1 | +????  | 1.08 (1.04-1.13) | 0.0005   | 20002_1162 | 5573/331586 | 0.636 | + | 0.234   | 3.29  | 0.0005  |

\*Associations reaching Bonferroni-corrected significance ( $P < 1.8e-6$ ) in the discovery PheWAS meta-analysis are highlighted in bold.

#Directions of effect in 23andMe, Gplc UK Biobank, FINRISK, CHOP and GWAS

^Statistical power to detect an association at  $P < 0.05$  in UK Biobank v2 based on the SNP MAF, the number of cases and controls in UK Biobank v2 and the OR observed in the PheWAS meta-analysis

§Weighted Z score meta-analysis using the association results from the 23andMe, FINRISK and CHOP PheWAS cohorts (when available), GWAS (when available) and UK Biobank v2. Weights are calculated based on the number of cases and controls. Details are provided in Methods. The Gplc UK Biobank association results are excluded in this meta-analysis.

**Supplementary Table 7. Novel association of the *PNPLA3* SNP rs738409 in the 23andMe cohort, before and after adjusting for elevated liver test**

| Phenotype                   | Unadjusted analysis |          |         |            | Elevated liver test-adjusted analysis* |          |         |            |
|-----------------------------|---------------------|----------|---------|------------|----------------------------------------|----------|---------|------------|
|                             | OR (CI95) ^         | P value  | N cases | N controls | OR (CI95) ^                            | P value  | N cases | N controls |
| Severe acne                 | 0.9 (0.88-0.93)     | 1.47e-11 | 14812   | 187018     | 0.9 (0.88-0.93)                        | 4.34e-12 | 14646   | 185390     |
| T2D                         | 1.09 (1.06-1.12)    | 1.62e-9  | 15428   | 262918     | 1.07 (1.03-1.1)                        | 3.75e-5  | 13160   | 226602     |
| High cholesterol            | 0.96 (0.94-0.98)    | 1.50e-5  | 86968   | 83599      | 0.95 (0.94-0.97)                       | 1.79e-6  | 76389   | 77211      |
| Anti-cholesterol medication | 0.97 (0.95-0.98)    | 0.0002   | 66819   | 193997     | 0.96 (0.94-0.98)                       | 5.77e-6  | 58115   | 166268     |
| Gallstones                  | 0.95 (0.92-0.98)    | 0.00047  | 13300   | 120654     | 0.93 (0.9-0.96)                        | 3.21e-5  | 11689   | 104259     |
| Gout                        | 0.94 (0.9-0.98)     | 0.0036   | 6452    | 127120     | 0.93 (0.88-0.97)                       | 0.0013   | 5629    | 109921     |

\*In the elevated liver test-adjusted analysis, self-report of elevated liver test was included as covariate in the logistic regression, and only participants who answered both liver test questions and questions related to the primary phenotype tested were included.

^Odds ratio of the minor allele, which is associated with elevated alanine aminotransferase (ALT) levels

**Supplementary Table 8. Association of the *IFIH1* SNP rs2111485 (in complete LD with the *IFIH1* missense SNP rs1990760) with asthma in 23andMe cohort, before and after adjusting for autoimmune diseases**

| <b>Analysis</b> | <b>N cases</b> | <b>N controls</b> | <b>OR (CI95)<sup>^</sup></b> | <b>P value</b> |
|-----------------|----------------|-------------------|------------------------------|----------------|
| unadjusted      | 28,400         | 126,511           | 1.033 (1.014-1.053)          | 6.5e-4         |
| adjusted*       | 22,028         | 95,775            | 1.034 (1.013-1.057)          | 1.9e-3         |

\*In the autoimmune disease-adjusted analysis, self-report of autoimmune disorder was included as covariate in the logistic regression, and only participants who answered both autoimmune and asthma-related questions were included.

<sup>^</sup>Odds ratio of the minor allele, which is known to protect against multiple autoimmune diseases.

## Supplementary References

1. Hampe, J. et al. A genome-wide association scan of nonsynonymous SNPs identifies a susceptibility variant for Crohn disease in ATG16L1. *Nat Genet* **39**, 207-211 (2007).
2. Rioux, J.D. et al. Genome-wide association study identifies new susceptibility loci for Crohn disease and implicates autophagy in disease pathogenesis. *Nat Genet.* **39**, 596-604. Epub 2007 Apr 2015. (2007).
3. Jostins, L. et al. Host-microbe interactions have shaped the genetic architecture of inflammatory bowel disease. *Nature* **491**, 119-124 (2012).
4. Lassen, K.G. et al. Atg16L1 T300A variant decreases selective autophagy resulting in altered cytokine signaling and decreased antibacterial defense. *Proc Natl Acad Sci U S A.* **111**, 7741-7746. doi: 7710.1073/pnas.1407001111. Epub 1407002014 May 1407001112. (2014).
5. Murthy, A. et al. A Crohn's disease variant in Atg16l1 enhances its degradation by caspase 3. *Nature.* **506**, 456-462. doi: 410.1038/nature13044. Epub 12014 Feb 13019. (2014).
6. Franke, A. et al. Genome-wide meta-analysis increases to 71 the number of confirmed Crohn's disease susceptibility loci. *Nat Genet.* **42**, 1118-1125. doi: 1110.1038/ng.1717. (2010).
7. Fairfax, B.P. et al. Innate immune activity conditions the effect of regulatory variants upon monocyte gene expression. *Science.* **343**, 1246949. doi: 1246910.1241126/science.1246949. (2014).
8. Janse, M. et al. Three ulcerative colitis susceptibility loci are associated with primary sclerosing cholangitis and indicate a role for IL2, REL, and CARD9. *Hepatology.* **53**, 1977-1985. doi: 1910.1002/hep.24307. Epub 22011 May 24302. (2011).
9. Rivas, M.A. et al. Deep resequencing of GWAS loci identifies independent rare variants associated with inflammatory bowel disease. *Nat Genet.* **43**, 1066-1073. doi: 1010.1038/ng.1952. (2011).
10. Lanternier, F. et al. Deep dermatophytosis and inherited CARD9 deficiency. *N Engl J Med.* **369**, 1704-1714. doi: 1710.1056/NEJMoa1208487. Epub 1202013 Oct 1208416. (2013).
11. Ruland, J. CARD9 signaling in the innate immune response. *Ann N Y Acad Sci.* **1143:35-44.**, 10.1196/annals.1443.1024. (2008).
12. Elishmereni, M., Bachelet, I. & Levi-Schaffer, F. DNAM-1: an amplifier of immune responses as a therapeutic target in various disorders. *Curr Opin Investig Drugs.* **9**, 491-496. (2008).
13. Xiong, P., Sang, H.W. & Zhu, M. Critical roles of co-activation receptor DNAX accessory molecule-1 in natural killer cell immunity. *Immunology.* **146**, 369-378. doi: 310.1111/imm.12516. Epub 12015 Sep 12528. (2015).
14. Onengut-Gumuscu, S. et al. Fine mapping of type 1 diabetes susceptibility loci and evidence for colocalization of causal variants with lymphoid gene enhancers. *Nat Genet.* **47**, 381-386. doi: 310.1038/ng.3245. Epub 2015 Mar 1039. (2015).
15. Gieger, C. et al. New gene functions in megakaryopoiesis and platelet formation. *Nature.* **480**, 201-208. doi: 210.1038/nature10659. (2011).
16. Gross, C.C. et al. Impaired NK-mediated regulation of T-cell activity in multiple sclerosis is reconstituted by IL-2 receptor modulation. *Proc Natl Acad Sci U S A.* **113**, E2973-2982. doi: 2910.1073/pnas.1524924113. Epub 1524922016 May 1524924119. (2016).
17. Lofgren, S.E. et al. A 3'-untranslated region variant is associated with impaired expression of CD226 in T and natural killer T cells and is associated with susceptibility to systemic lupus erythematosus. *Arthritis Rheum.* **62**, 3404-3414. doi: 3410.1002/art.27677. (2010).

18. Divorcy, N., Mackenzie, A.E., Nicklin, S.A. & Milligan, G. G protein-coupled receptor 35: an emerging target in inflammatory and cardiovascular disease. *Front Pharmacol.* **6:41.**, 10.3389/fphar.2015.00041. eCollection 02015. (2015).
19. Lassen, K.G. et al. Genetic Coding Variant in GPR65 Alters Lysosomal pH and Links Lysosomal Dysfunction with Colitis Risk. *Immunity.* **44**, 1392-1405. doi: 10.1016/j.immuni.2016.1305.1007. Epub 2016 Jun 1397. (2016).
20. Looney, B.M., Xia, C.Q., Concannon, P., Ostrov, D.A. & Clare-Salzler, M.J. Effects of type 1 diabetes-associated IFIH1 polymorphisms on MDA5 function and expression. *Curr Diab Rep.* **15**, 96. doi: 10.1007/s11892-11015-10656-11898. (2015).
21. Oda, H. et al. Aicardi-Goutieres syndrome is caused by IFIH1 mutations. *Am J Hum Genet.* **95**, 121-125. doi: 10.1016/j.ajhg.2014.1006.1007. (2014).
22. Rice, G.I. et al. Gain-of-function mutations in IFIH1 cause a spectrum of human disease phenotypes associated with upregulated type I interferon signaling. *Nat Genet.* **46**, 503-509. doi: 10.1038/ng.2933. Epub 2014 Mar 1030. (2014).
23. Rutsch, F. et al. A specific IFIH1 gain-of-function mutation causes Singleton-Merten syndrome. *Am J Hum Genet.* **96**, 275-282. doi: 10.1016/j.ajhg.2014.1012.1014. Epub 2015 Jan 1022. (2015).
24. Asgari, S. et al. Severe viral respiratory infections in children with IFIH1 loss-of-function mutations. *Proc Natl Acad Sci U S A* **117**, 1704259114 (2017).
25. Lamborn, I.T. et al. Recurrent rhinovirus infections in a child with inherited MDA5 deficiency. *J Exp Med.* **214**, 1949-1972. doi: 10.1084/jem.20161759. Epub 20162017 Jun 20161712. (2017).
26. Budu-Aggrey, A. et al. A rare coding allele in IFIH1 is protective for psoriatic arthritis. *Ann Rheum Dis.* **76**, 1321-1324. doi: 10.1136/annrheumdis-2016-210592. Epub 212017 May 210513. (2017).
27. Downes, K. et al. Reduced expression of IFIH1 is protective for type 1 diabetes. *PLoS One.* **5(9)**. e12646. doi: 10.1371/journal.pone.0012646. (2010).
28. Jin, Y. et al. Genome-wide association analyses identify 13 new susceptibility loci for generalized vitiligo. *Nat Genet.* **44**, 676-680. doi: 10.1038/ng.2272. (2012).
29. Jin, Y., Andersen, G.H., Santorico, S.A. & Spritz, R.A. Multiple Functional Variants of IFIH1, a Gene Involved in Triggering Innate Immune Responses, Protect against Vitiligo. *J Invest Dermatol.* **137**, 522-524. doi: 10.1016/j.jid.2016.1009.1021. Epub 2016 Oct 1015. (2017).
30. Li, Y. et al. Carriers of rare missense variants in IFIH1 are protected from psoriasis. *J Invest Dermatol.* **130**, 2768-2772. doi: 10.1038/jid.2010.2214. Epub 2010 Jul 2729. (2010).
31. Nejentsev, S., Walker, N., Riches, D., Egholm, M. & Todd, J.A. Rare variants of IFIH1, a gene implicated in antiviral responses, protect against type 1 diabetes. *Science.* **324**, 387-389. doi: 10.1126/science.1167728. Epub 1162009 Mar 1167725. (2009).
32. Shigemoto, T. et al. Identification of loss of function mutations in human genes encoding RIG-I and MDA5: implications for resistance to type I diabetes. *J Biol Chem.* **284**, 13348-13354. doi: 10.1074/jbc.M809449200. Epub 809442009 Mar 809449226. (2009).
33. Smyth, D.J. et al. A genome-wide association study of nonsynonymous SNPs identifies a type 1 diabetes locus in the interferon-induced helicase (IFIH1) region. *Nat Genet.* **38**, 617-619. Epub 2006 May 2014. (2006).
34. Zurawek, M. et al. Cumulative effect of IFIH1 variants and increased gene expression associated with type 1 diabetes. *Diabetes Res Clin Pract.* **107**, 259-266. doi: 10.1016/j.diabres.2014.1011.1008. Epub 2014 Dec 1014. (2015).



35. Bentham, J. et al. Genetic association analyses implicate aberrant regulation of innate and adaptive immunity genes in the pathogenesis of systemic lupus erythematosus. *Nat Genet* **47**, 1457-1464 (2015).
36. Liu, J.Z. et al. Association analyses identify 38 susceptibility loci for inflammatory bowel disease and highlight shared genetic risk across populations. *Nat Genet.* **47**, 979-986. doi: 910.1038/ng.3359. Epub 2015 Jul 1020. (2015).
37. Gorman, J.A. et al. The A946T variant of the RNA sensor IFIH1 mediates an interferon program that limits viral infection but increases the risk for autoimmunity. *Nat Immunol.* **18**, 744-752. doi: 710.1038/ni.3766. Epub 2017 May 1029. (2017).
38. Okada, Y. et al. Genetics of rheumatoid arthritis contributes to biology and drug discovery. *Nature* **506**, 376-381 (2014).
39. Taylor, K.E. et al. Genome-Wide Association Analysis Reveals Genetic Heterogeneity of Sjogren's Syndrome According to Ancestry. *Arthritis Rheumatol.* **69**, 1294-1305. doi: 1210.1002/art.40040. Epub 42017 May 40049. (2017).
40. Liu, X. et al. Genome-wide meta-analyses identify three loci associated with primary biliary cirrhosis. *Nat Genet.* **42**, 658-660. doi: 610.1038/ng.1627. Epub 2010 Jul 1018. (2010).
41. Radstake, T.R. et al. Genome-wide association study of systemic sclerosis identifies CD247 as a new susceptibility locus. *Nat Genet.* **42**, 426-429. doi: 410.1038/ng.1565. Epub 2010 Apr 1011. (2010).
42. Hedl, M. & Abraham, C. IRF5 risk polymorphisms contribute to interindividual variance in pattern recognition receptor-mediated cytokine secretion in human monocyte-derived cells. *J Immunol.* **188**, 5348-5356. doi: 5310.4049/jimmunol.1103319. Epub 1102012 Apr 1103327. (2012).
43. Hedl, M., Yan, J. & Abraham, C. IRF5 and IRF5 Disease-Risk Variants Increase Glycolysis and Human M1 Macrophage Polarization by Regulating Proximal Signaling and Akt2 Activation. *Cell Rep.* **16**, 2442-2455. doi: 2410.1016/j.celrep.2016.2407.2060. Epub 2016 Aug 2418. (2016).
44. Niewold, T.B. et al. IRF5 haplotypes demonstrate diverse serological associations which predict serum interferon alpha activity and explain the majority of the genetic association with systemic lupus erythematosus. *Ann Rheum Dis.* **71**, 463-468. doi: 410.1136/annrheumdis-2011-200463. Epub 202011 Nov 200416. (2012).
45. Kreins, A.Y. et al. Human TYK2 deficiency: Mycobacterial and viral infections without hyper-IgE syndrome. *J Exp Med.* **212**, 1641-1662. doi: 1610.1084/jem.20140280. Epub 20142015 Aug 20140224. (2015).
46. Minegishi, Y. et al. Human tyrosine kinase 2 deficiency reveals its requisite roles in multiple cytokine signals involved in innate and acquired immunity. *Immunity.* **25**, 745-755. (2006).
47. Tsoi, L.C. et al. Identification of 15 new psoriasis susceptibility loci highlights the role of innate immunity. *Nat Genet.* **44**, 1341-1348. doi: 1310.1038/ng.2467. Epub 2012 Nov 1311. (2012).
48. Beecham, A.H. et al. Analysis of immune-related loci identifies 48 new susceptibility variants for multiple sclerosis. *Nat Genet.* **45**, 1353-1360. doi: 1310.1038/ng.2770. Epub 2013 Sep 1329. (2013).
49. Diogo, D. et al. TYK2 protein-coding variants protect against rheumatoid arthritis and autoimmunity, with no evidence of major pleiotropic effects on non-autoimmune complex traits. *PLoS One.* **10**, e0122271. doi: 0122210.0121371/journal.pone.0122271. eCollection 0122015. (2015).

50. Couturier, N. et al. Tyrosine kinase 2 variant influences T lymphocyte polarization and multiple sclerosis susceptibility. *Brain*. **134**, 693-703. doi: 610.1093/brain/awr1010. (2011).
51. Dendrou, C.A. et al. Resolving TYK2 locus genotype-to-phenotype differences in autoimmunity. *Sci Transl Med*. **8**, 363ra149. (2016).
52. Bonnelykke, K. et al. A genome-wide association study identifies CDHR3 as a susceptibility locus for early childhood asthma with severe exacerbations. *Nat Genet*. **46**, 51-55. doi: 10.1038/ng.2830. Epub 2013 Nov 1017. (2014).
53. Bochkov, Y.A. et al. Cadherin-related family member 3, a childhood asthma susceptibility gene product, mediates rhinovirus C binding and replication. *Proc Natl Acad Sci U S A*. **112**, 5485-5490. doi: 5410.1073/pnas.1421178112. Epub 1421172015 Apr 1421178116. (2015).
54. Asakai, R., Chung, D.W., Ratnoff, O.D. & Davie, E.W. Factor XI (plasma thromboplastin antecedent) deficiency in Ashkenazi Jews is a bleeding disorder that can result from three types of point mutations. *Proc Natl Acad Sci U S A*. **86**, 7667-7671. (1989).
55. Sabater-Lleal, M. et al. A genome-wide association study identifies KNG1 as a genetic determinant of plasma factor XI Level and activated partial thromboplastin time. *Arterioscler Thromb Vasc Biol*. **32**, 2008-2016. doi: 2010.1161/ATVBAHA.2112.248492. Epub 242012 Jun 248414. (2012).
56. Tang, W. et al. Genetic associations for activated partial thromboplastin time and prothrombin time, their gene expression profiles, and risk of coronary artery disease. *Am J Hum Genet*. **91**, 152-162. doi: 110.1016/j.ajhg.2012.1005.1009. Epub 2012 Jun 1014. (2012).
57. Tang, W. et al. A genome-wide association study for venous thromboembolism: the extended cohorts for heart and aging research in genomic epidemiology (CHARGE) consortium. *Genet Epidemiol*. **37**, 512-521. doi: 510.1002/gepi.21731. Epub 22013 May 21735. (2013).
58. Buller, H.R. et al. Factor XI antisense oligonucleotide for prevention of venous thrombosis. *N Engl J Med*. **372**, 232-240. doi: 210.1056/NEJMoa1405760. Epub 1402014 Dec 1405767. (2015).
59. Egeberg, O. Factor XII defect and hemorrhage. Evidence for a new type of hereditary hemostatic disorder. *Thromb Diath Haemorrh*. **23**, 432-440. (1970).
60. Ratnoff, O.D. & Steinberg, A.G. Further studies on the inheritance of Hageman trait. *J Lab Clin Med*. **59**, 980-985. (1962).
61. Dewald, G. & Bork, K. Missense mutations in the coagulation factor XII (Hageman factor) gene in hereditary angioedema with normal C1 inhibitor. *Biochem Biophys Res Commun*. **343**, 1286-1289. doi: 1210.1016/j.bbrc.2006.1203.1092 (2006).
62. Renne, T. et al. Defective thrombus formation in mice lacking coagulation factor XII. *J Exp Med*. **202**, 271-281. Epub 2005 Jul 2011. (2005).
63. Calafell, F. et al. Sequence variation and genetic evolution at the human F12 locus: mapping quantitative trait nucleotides that influence FXII plasma levels. *Hum Mol Genet*. **19**, 517-525. doi: 510.1093/hmg/ddp1517. Epub 2009 Nov 1023. (2010).
64. Houlihan, L.M. et al. Common variants of large effect in F12, KNG1, and HRG are associated with activated partial thromboplastin time. *Am J Hum Genet*. **86**, 626-631. doi: 610.1016/j.ajhg.2010.1002.1016. Epub 2010 Mar 1018. (2010).
65. Locke, A.E. et al. Genetic studies of body mass index yield new insights for obesity biology. *Nature* **518**, 197-206 (2015).
66. Dobrin, R. et al. Dissecting cis regulation of gene expression in human metabolic tissues. *PLoS One* **6**, e23480. doi: 23410.21371/journal.pone.0023480. Epub 0022011 Aug 0023431. (2011).

67. Hong, J.H. et al. GDF15 Is a Novel Biomarker for Impaired Fasting Glucose. *Diabetes Metab J.* **38**, 472-479. doi: 410.4093/dmj.2014.4038.4096.4472. Epub 2014 Dec 4015. (2014).
68. Ehret, G.B. et al. Genetic variants in novel pathways influence blood pressure and cardiovascular disease risk. *Nature.* **478**, 103-109. doi: 110.1038/nature10405. (2011).
69. Rippe, C. et al. Hypertension reduces soluble guanylyl cyclase expression in the mouse aorta via the Notch signaling pathway. *Sci Rep.* **7**, 1334. doi: 1310.1038/s41598-41017-01392-41591. (2017).
70. Herve, D. et al. Loss of alpha1beta1 soluble guanylate cyclase, the major nitric oxide receptor, leads to moyamoya and achalasia. *Am J Hum Genet.* **94**, 385-394. doi: 310.1016/j.ajhg.2014.1001.1018. Epub 2014 Feb 1027. (2014).
71. de Boer, R.A. et al. A genome-wide association study of circulating galectin-3. *PLoS One* **7**, e47385. doi: 47310.41371/journal.pone.0047385. Epub 0042012 Oct 0047389. (2012).
72. Chambers, J.C. et al. Genome-wide association study identifies loci influencing concentrations of liver enzymes in plasma. *Nat Genet.* **43**, 1131-1138. doi: 1110.1038/ng.1970. (2011).
73. Speliotes, E.K., Butler, J.L., Palmer, C.D., Voight, B.F. & Hirschhorn, J.N. PNPLA3 variants specifically confer increased risk for histologic nonalcoholic fatty liver disease but not metabolic disease. *Hepatology.* **52**, 904-912. doi: 910.1002/hep.23768. (2010).
74. Tian, C., Stokowski, R.P., Kershenovich, D., Ballinger, D.G. & Hinds, D.A. Variant in PNPLA3 is associated with alcoholic liver disease. *Nat Genet.* **42**, 21-23. doi: 10.1038/ng.1488. Epub 2009 Nov 1029. (2010).
75. Li, J.Z. et al. Chronic overexpression of PNPLA3I148M in mouse liver causes hepatic steatosis. *J Clin Invest.* **122**, 4130-4144. (2012).
76. Smagris, E. et al. Pnpla3I148M knockin mice accumulate PNPLA3 on lipid droplets and develop hepatic steatosis. *Hepatology.* **61**, 108-118. doi: 110.1002/hep.27242. Epub 22014 Oct 27241. (2015).
77. Sladek, R. et al. A genome-wide association study identifies novel risk loci for type 2 diabetes. *Nature.* **445**, 881-885. Epub 2007 Feb 2011. (2007).
78. Flannick, J. et al. Loss-of-function mutations in SLC30A8 protect against type 2 diabetes. *Nat Genet.* **46**, 357-363. doi: 310.1038/ng.2915. Epub 2014 Mar 1032. (2014).
79. Paisan-Ruiz, C., Lewis, P.A. & Singleton, A.B. LRRK2: cause, risk, and mechanism. *J Parkinsons Dis* **3**, 85-103. doi: 110.3233/JPD-130192. (2013).
80. Nalls, M.A. et al. Large-scale meta-analysis of genome-wide association data identifies six new risk loci for Parkinson's disease. *Nat Genet* **46**, 989-993 (2014).
81. Cang, C., Aranda, K., Seo, Y.J., Gasnier, B. & Ren, D. TMEM175 Is an Organelle K(+) Channel Regulating Lysosomal Function. *Cell.* **162**, 1101-1112. doi: 1110.1016/j.cell.2015.1108.1002. (2015).
82. Jinn, S. et al. TMEM175 deficiency impairs lysosomal and mitochondrial function and increases alpha-synuclein aggregation. *Proc Natl Acad Sci U S A.* **114**, 2389-2394. doi: 2310.1073/pnas.1616332114. Epub 1616332017 Feb 1616332113. (2017).
83. Nikpay, M. et al. A comprehensive 1,000 Genomes-based genome-wide association meta-analysis of coronary artery disease. *Nat Genet.* **47**, 1121-1130. doi: 1110.1038/ng.3396. Epub 2015 Sep 1127. (2015).
84. Ferreira, R.C. et al. Association of IFIH1 and other autoimmunity risk alleles with selective IgA deficiency. *Nat Genet.* **42**, 777-780. doi: 710.1038/ng.1644. Epub 2010 Aug 1038. (2010).

85. Jin, Y. et al. Genome-wide association studies of autoimmune vitiligo identify 23 new risk loci and highlight key pathways and regulatory variants. *Nat Genet.* **48**, 1418-1424. doi: 1410.1038/ng.3680. Epub 2016 Oct 1410. (2016).
86. Buch, S. et al. A genome-wide association study confirms PNPLA3 and identifies TM6SF2 and MBOAT7 as risk loci for alcohol-related cirrhosis. *Nat Genet.* **47**, 1443-1448. doi: 1410.1038/ng.3417. Epub 2015 Oct 1419. (2015).
87. Liu, C.T. et al. Trans-ethnic Meta-analysis and Functional Annotation Illuminates the Genetic Architecture of Fasting Glucose and Insulin. *Am J Hum Genet.* **99**, 56-75. doi: 10.1016/j.ajhg.2016.1005.1006. Epub 2016 Jun 1016. (2016).
88. Mahajan, A. et al. Genome-wide trans-ancestry meta-analysis provides insight into the genetic architecture of type 2 diabetes susceptibility. *Nat Genet.* **46**, 234-244. doi: 210.1038/ng.2897. Epub 2014 Feb 1039. (2014).
